# Supplementary material for: Ten Plastomes of Crassula (Crassulaceae) and Phylogenetic Implications
Source: MDPI journal article supplement (doi:10.3390/biology11121779), 2022-12-07

*accD*:

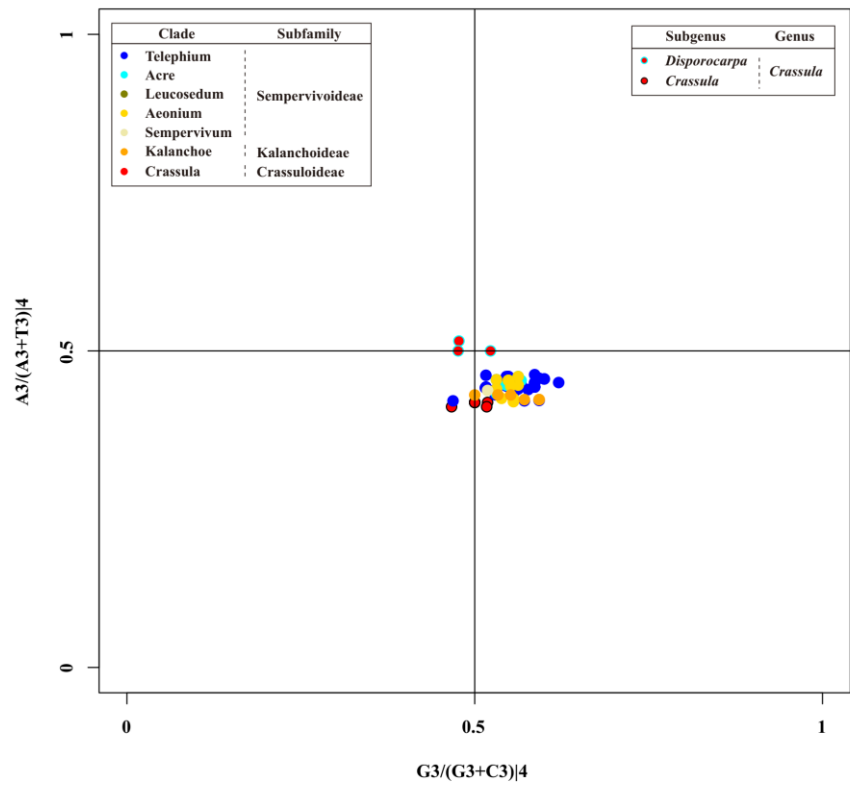

*atpA*:

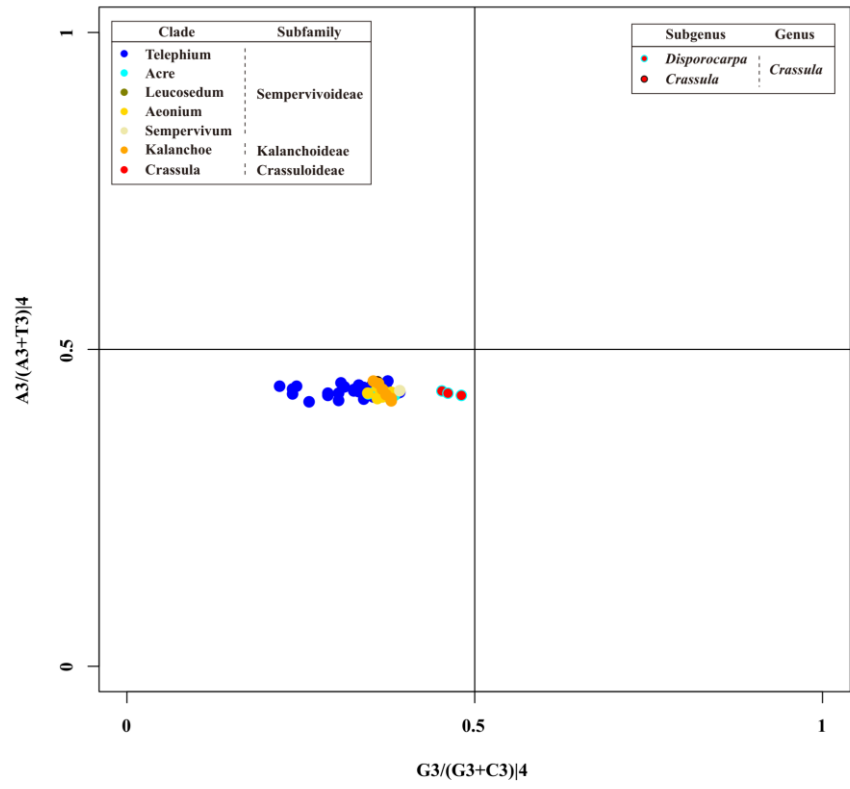

*atpB*:

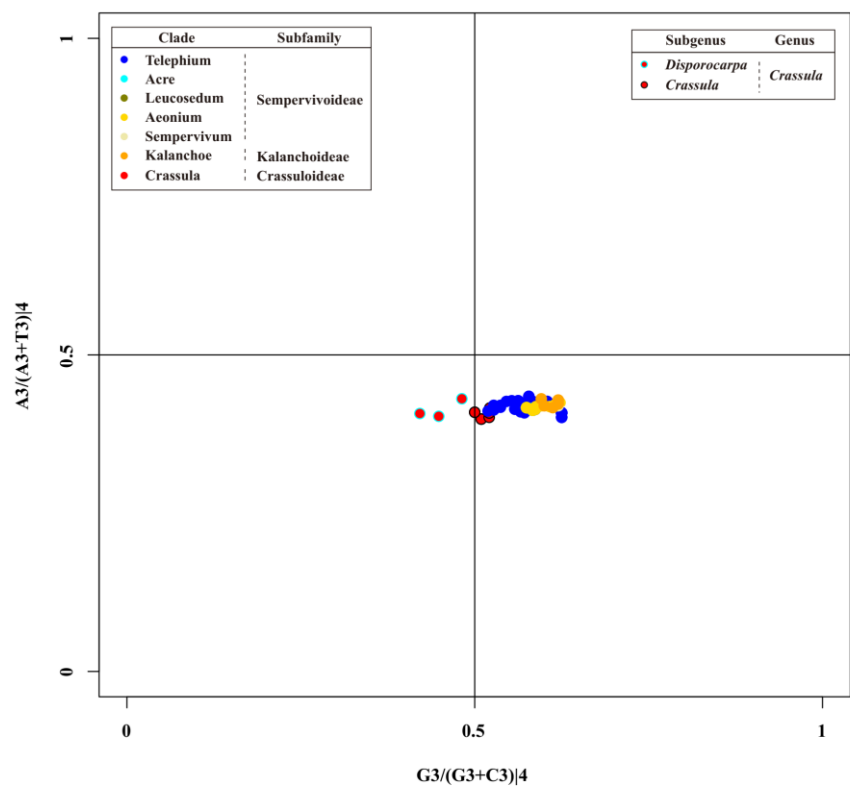

*atpE*:

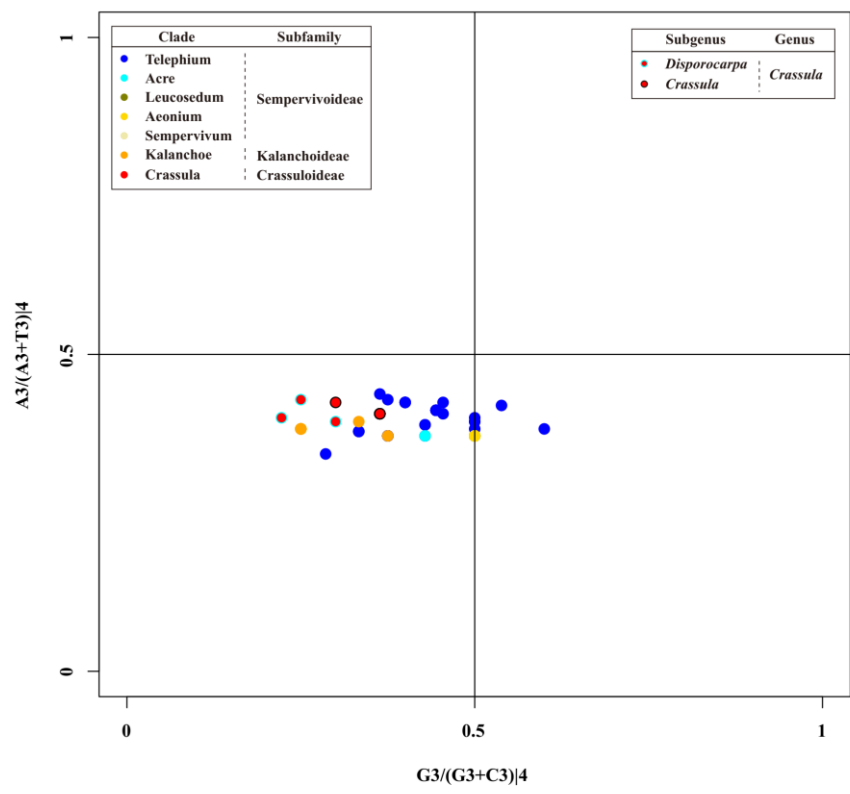

*atpF*:

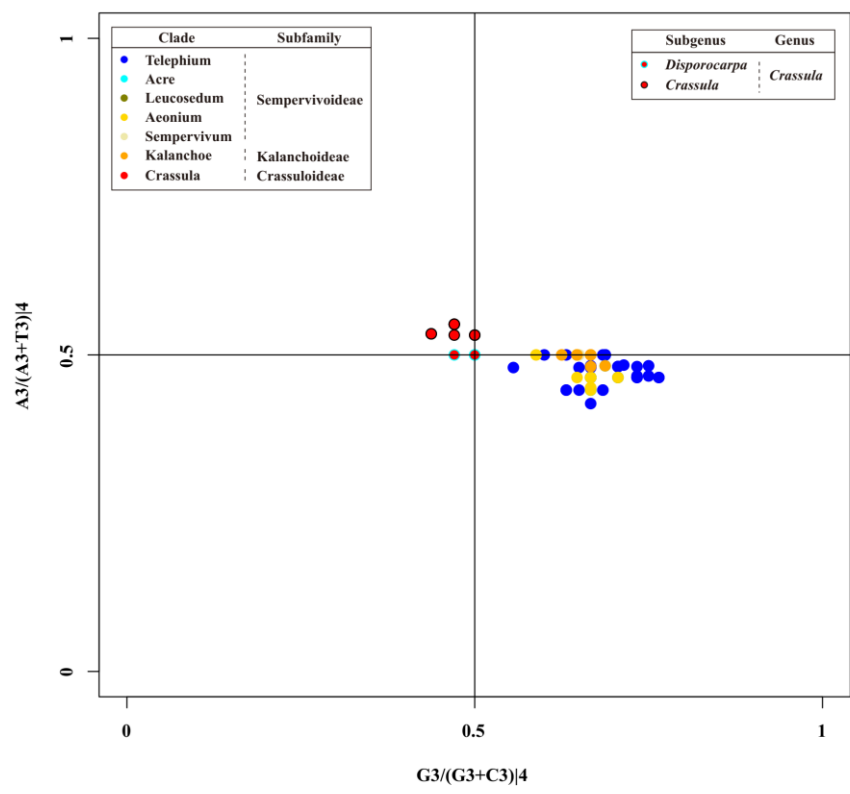

*atpI*:

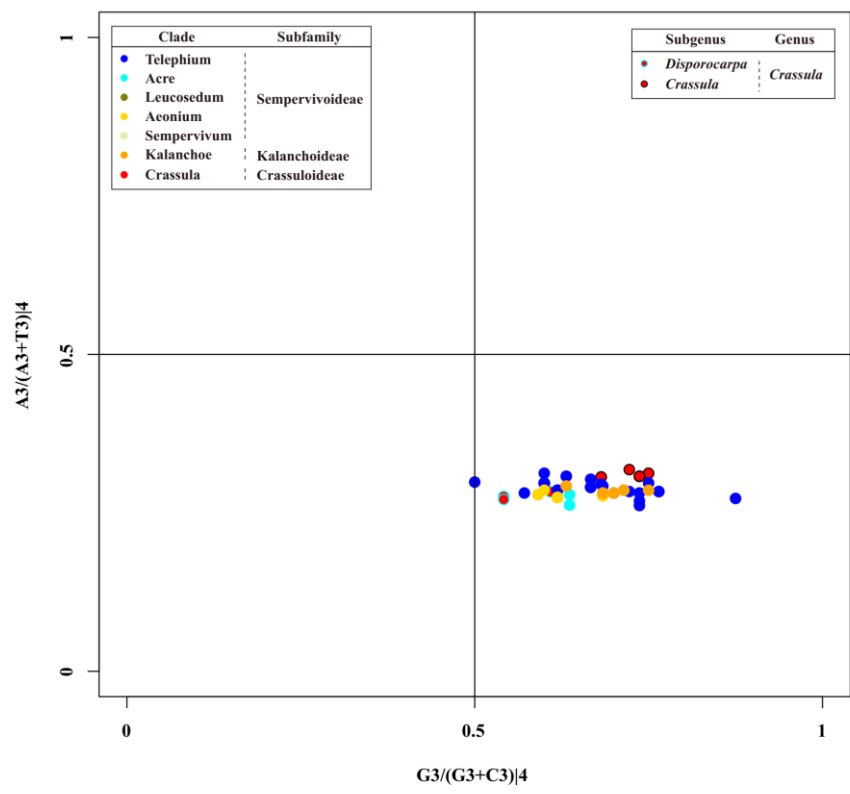

*ccsA*:

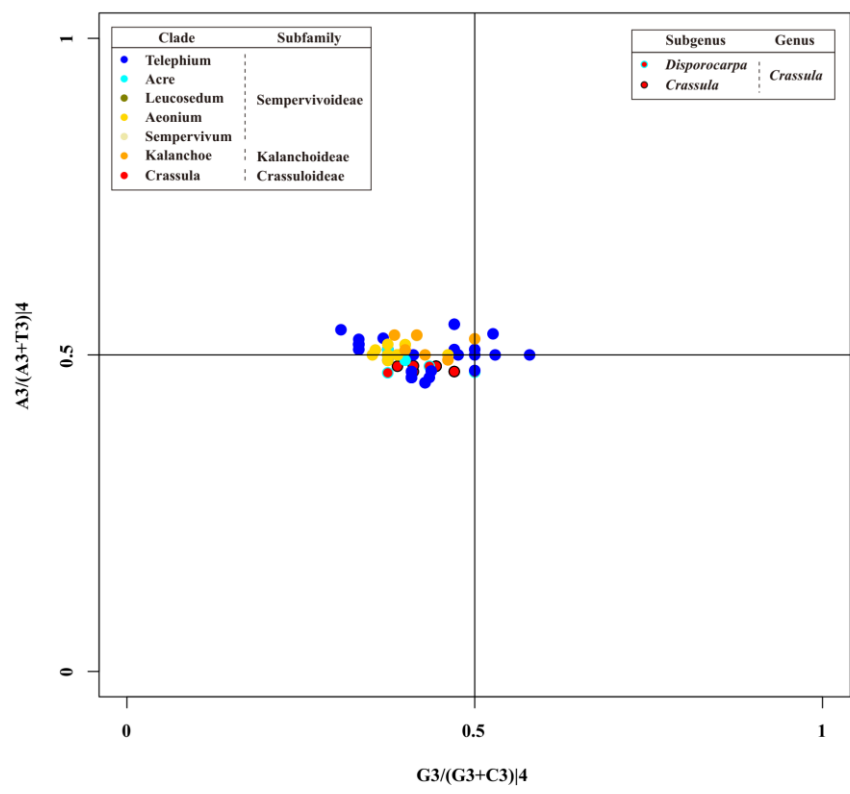

*cemA*:

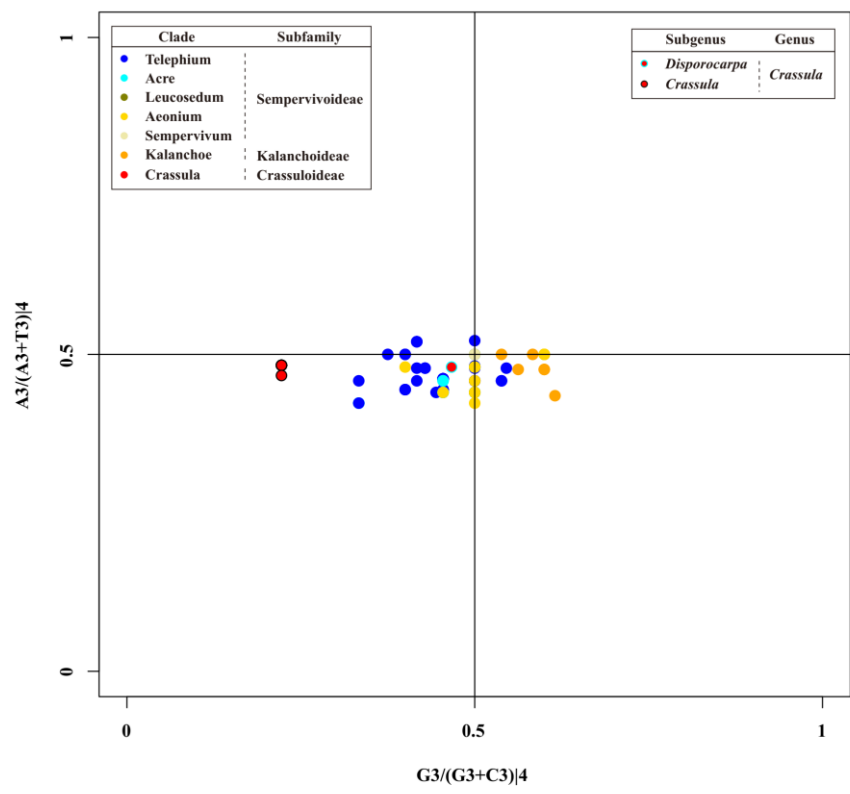

*clpP*:

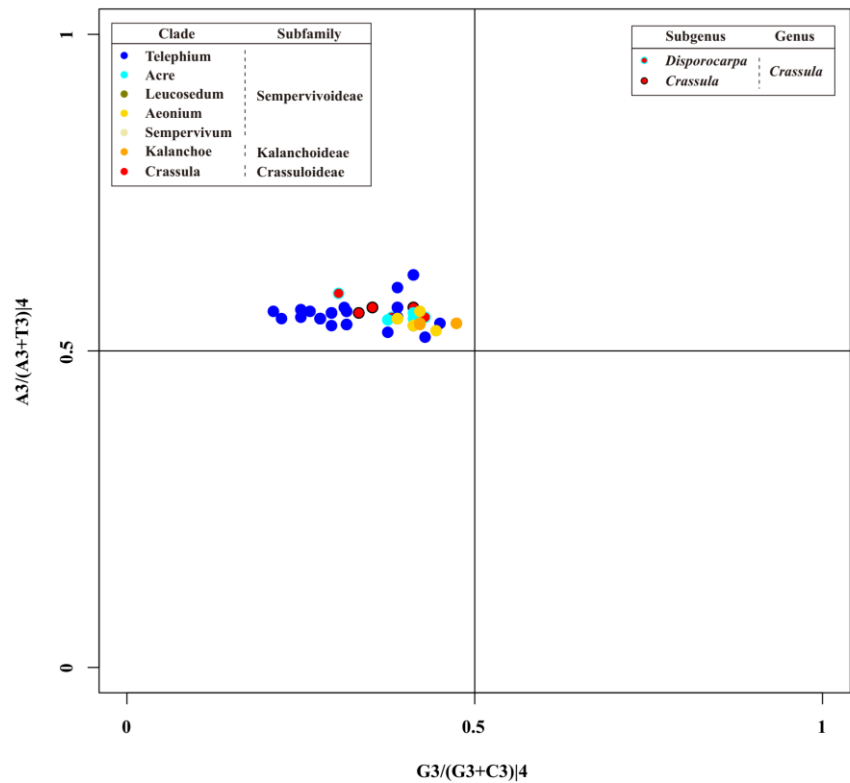

*ndhA*:

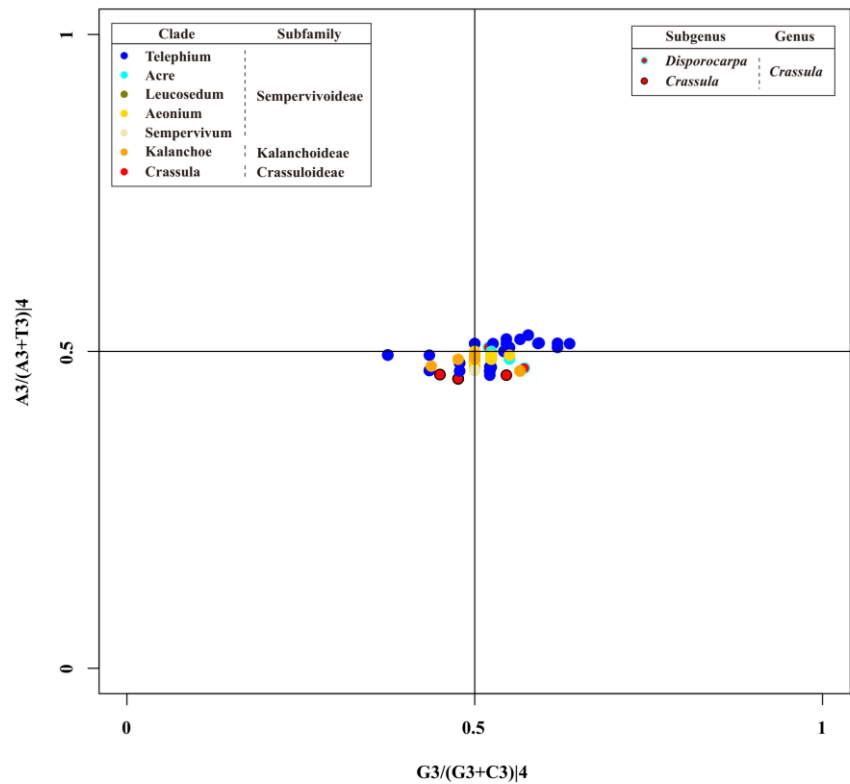

*ndhB*:

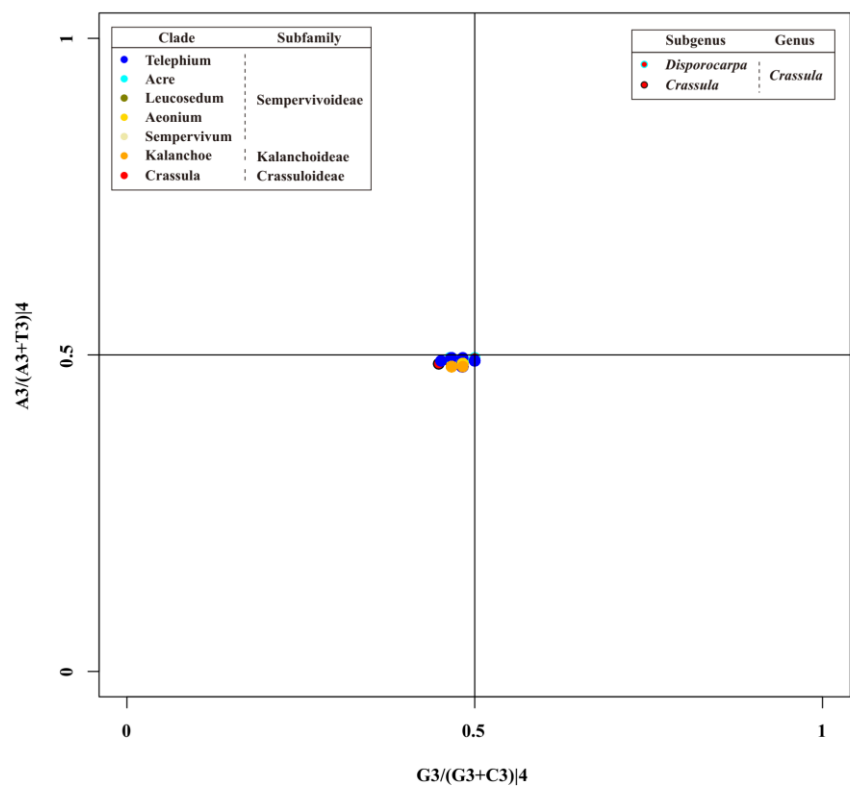

*ndhC*:

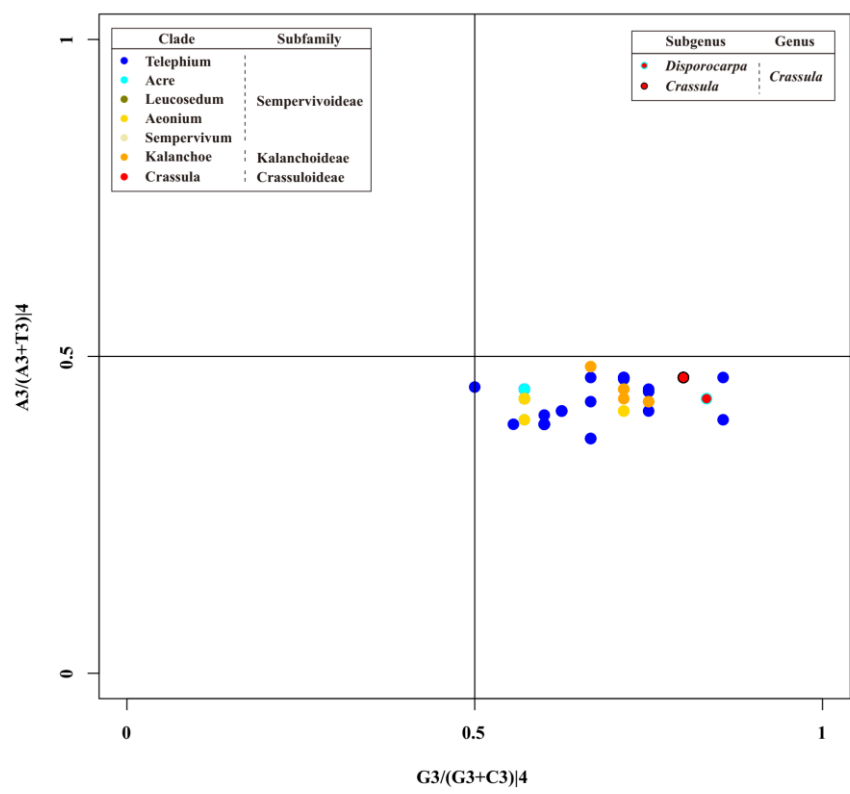

*ndhD*:

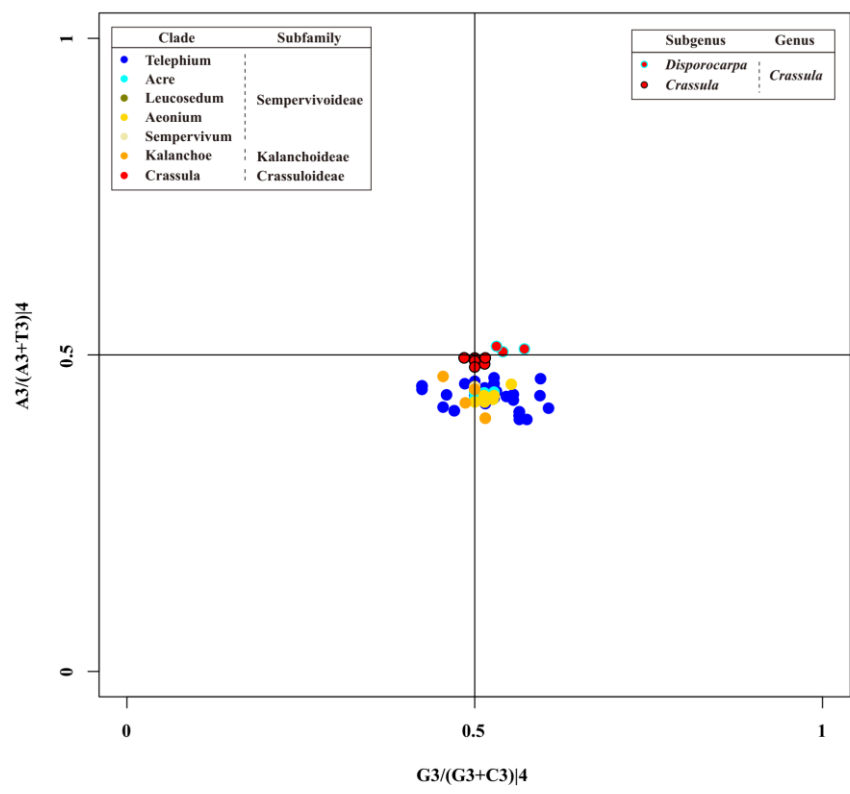

*ndhE*:

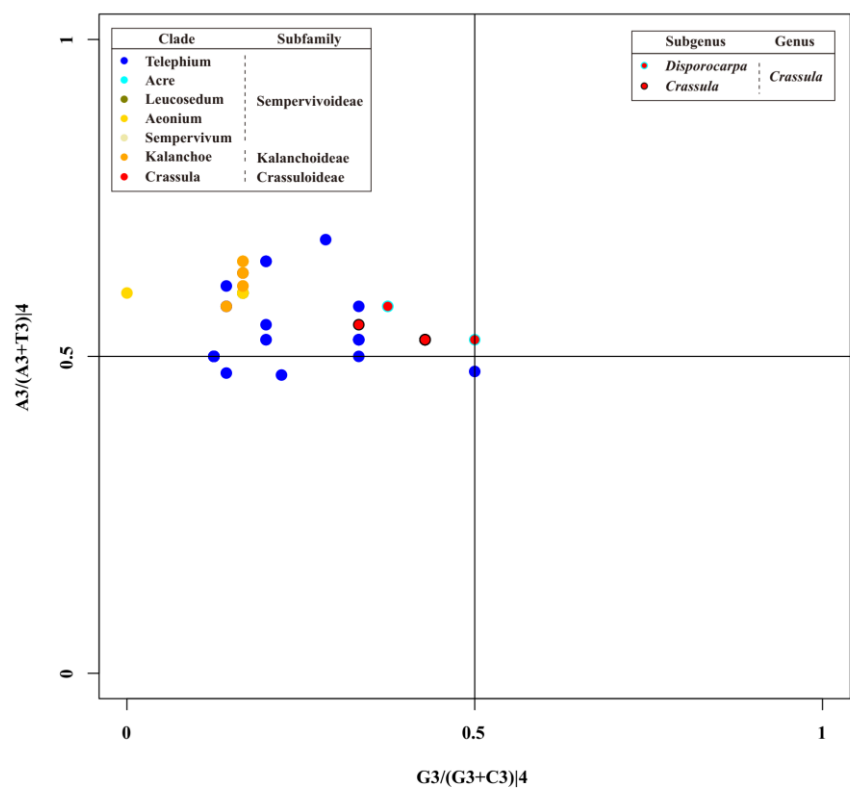

*ndhF*:

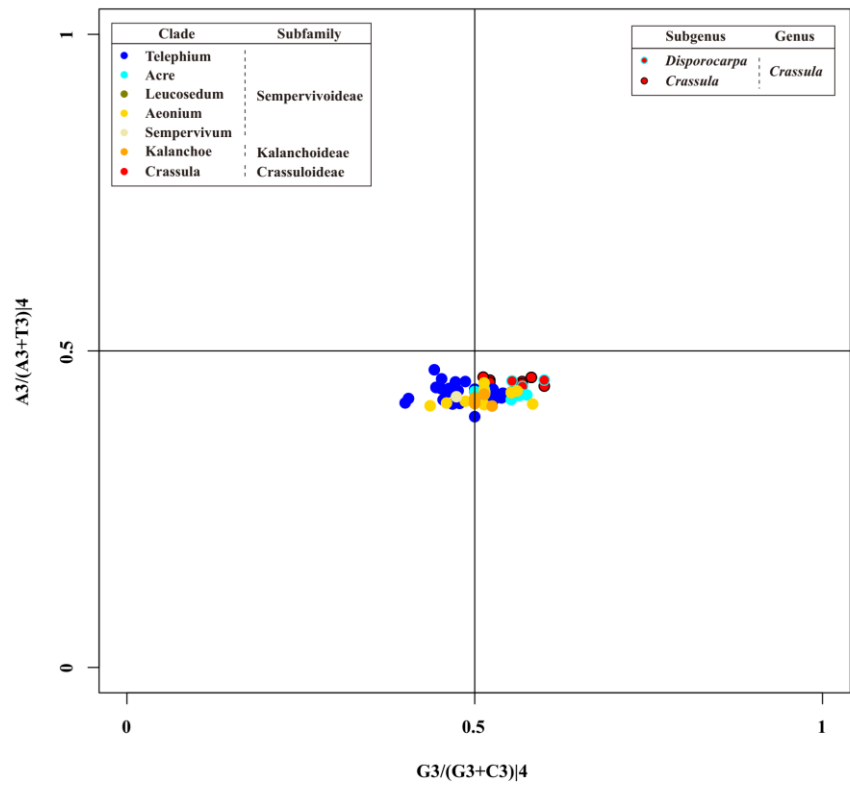

*ndhG*:

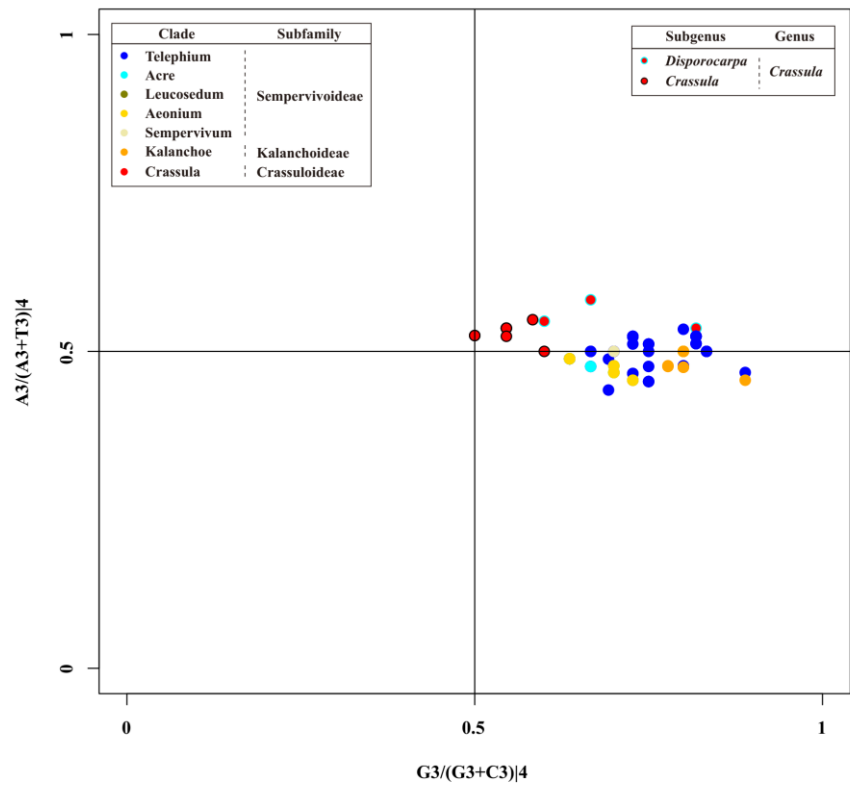



*ndhH*:

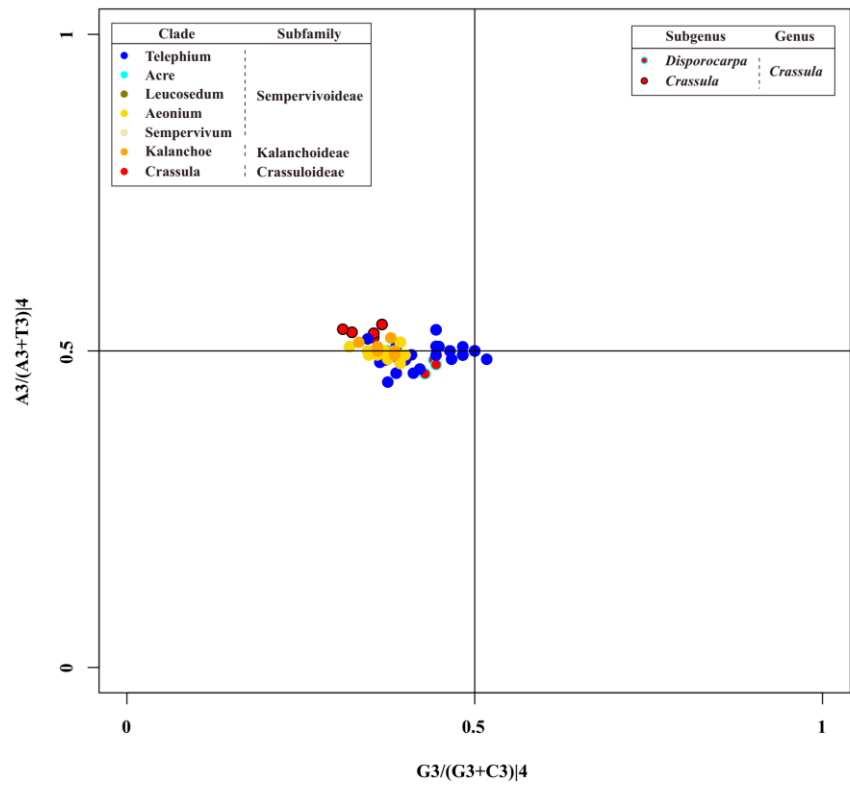

*ndhI*:

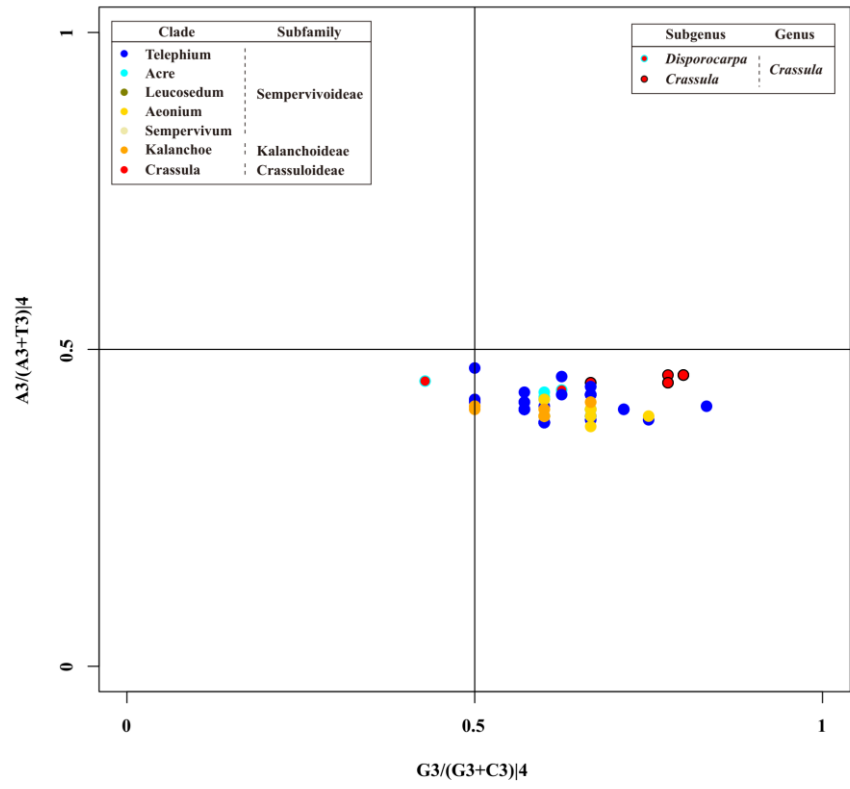

*ndhJ*:

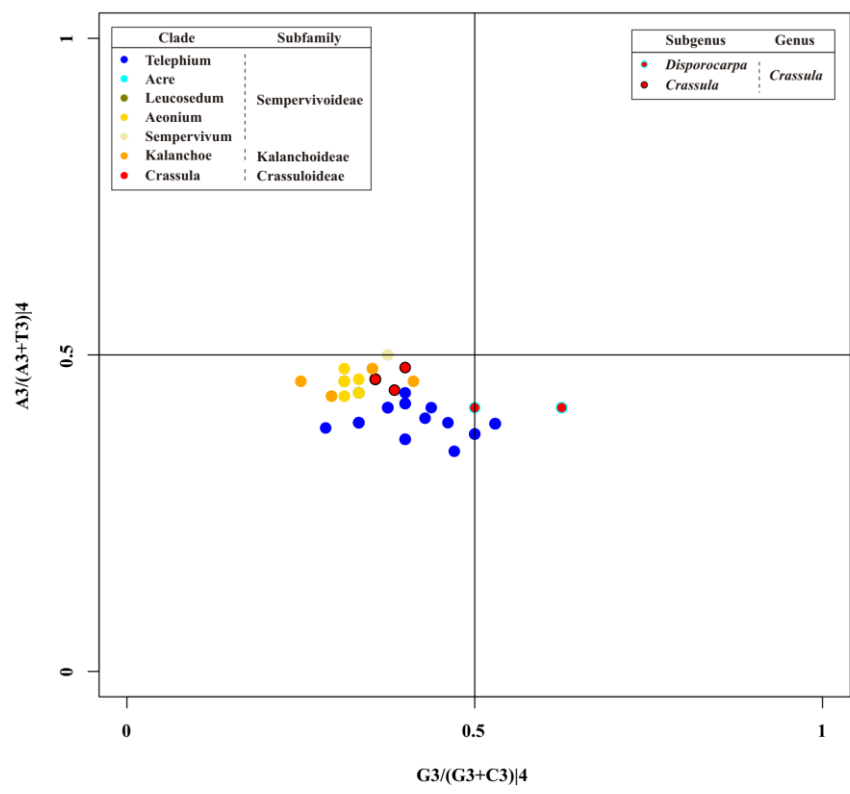

*ndhK*:

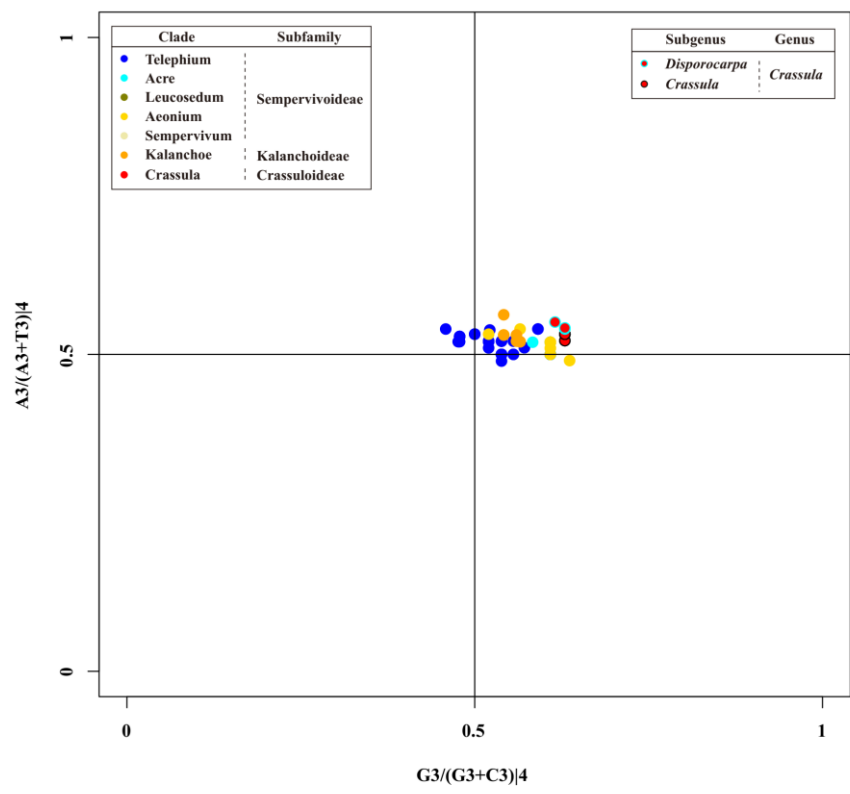

*pafI:*

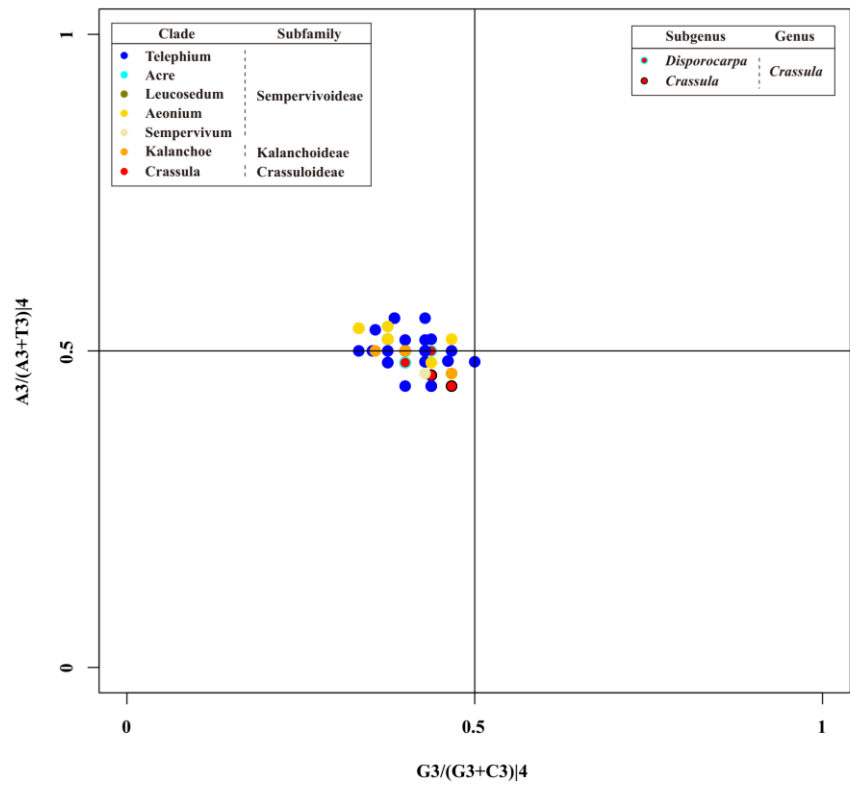

*pafII:*

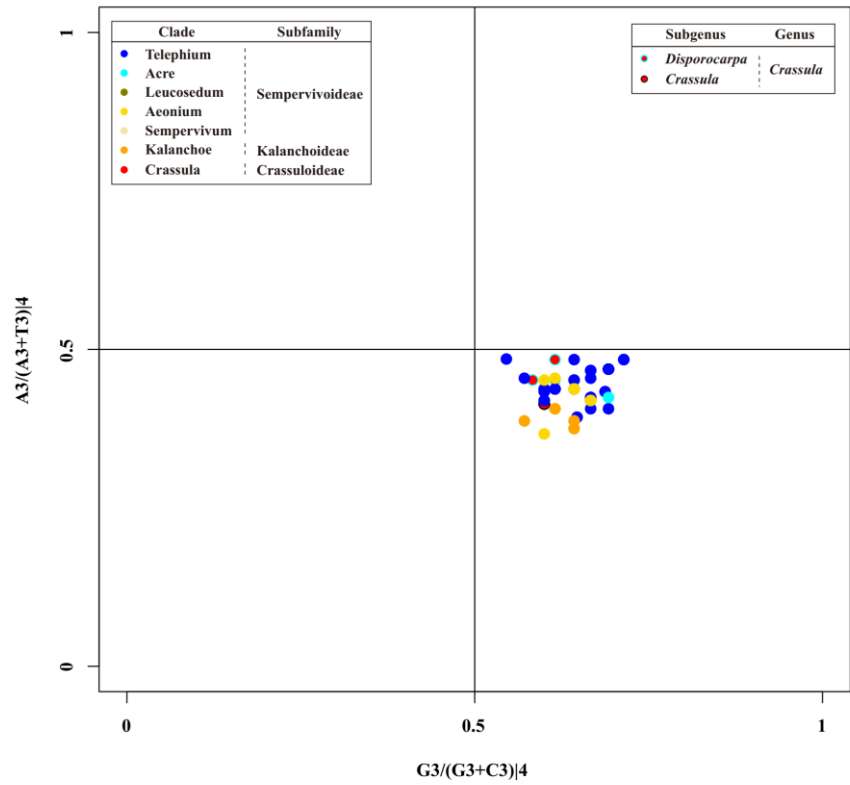

*petA*:

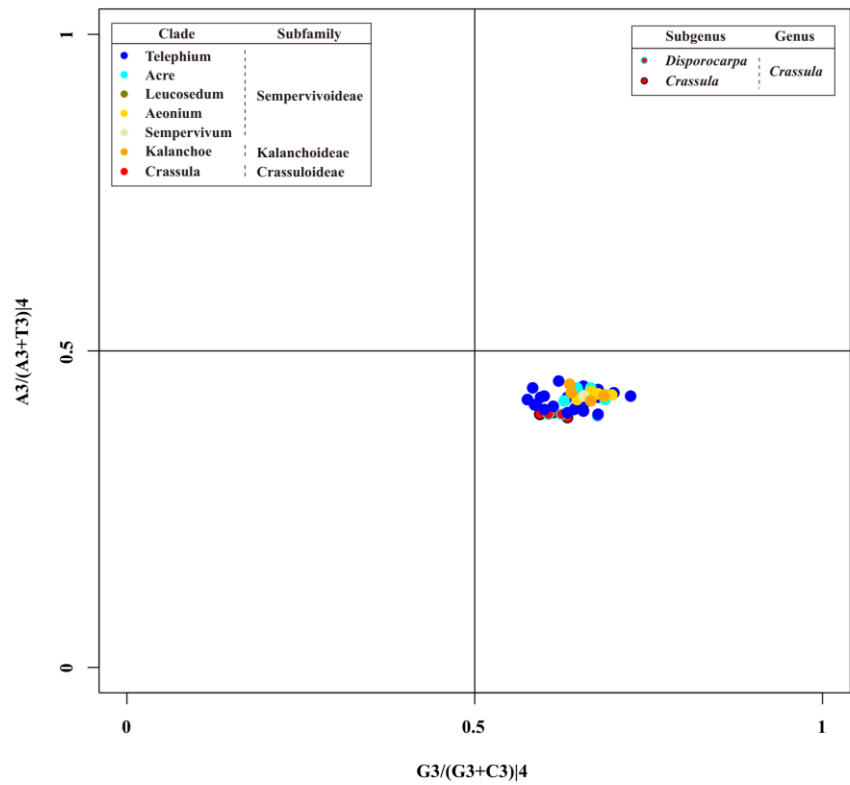

*petB*:

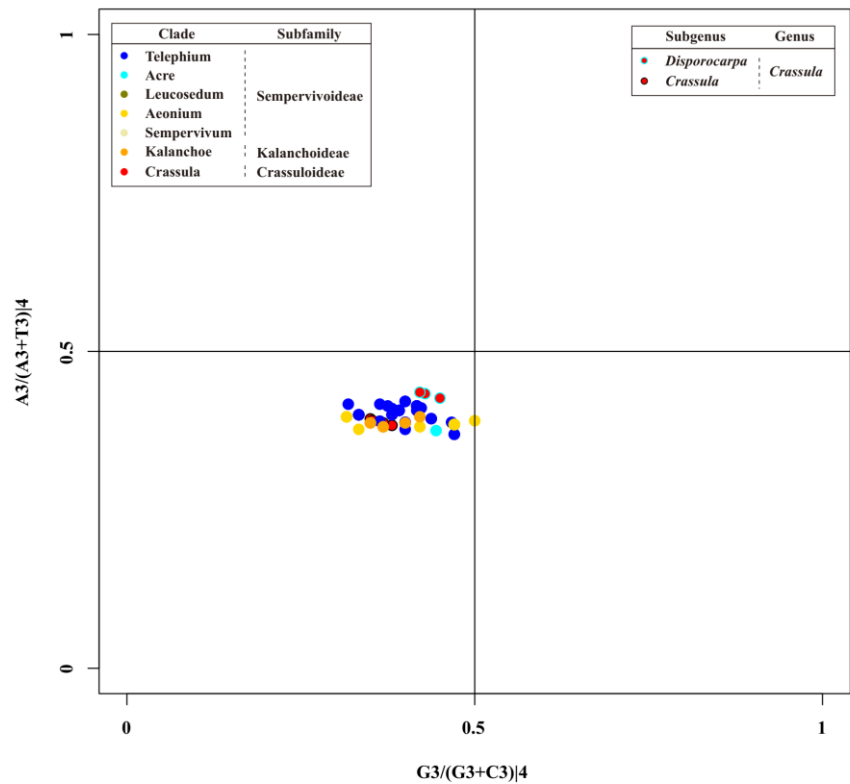

*petD:*

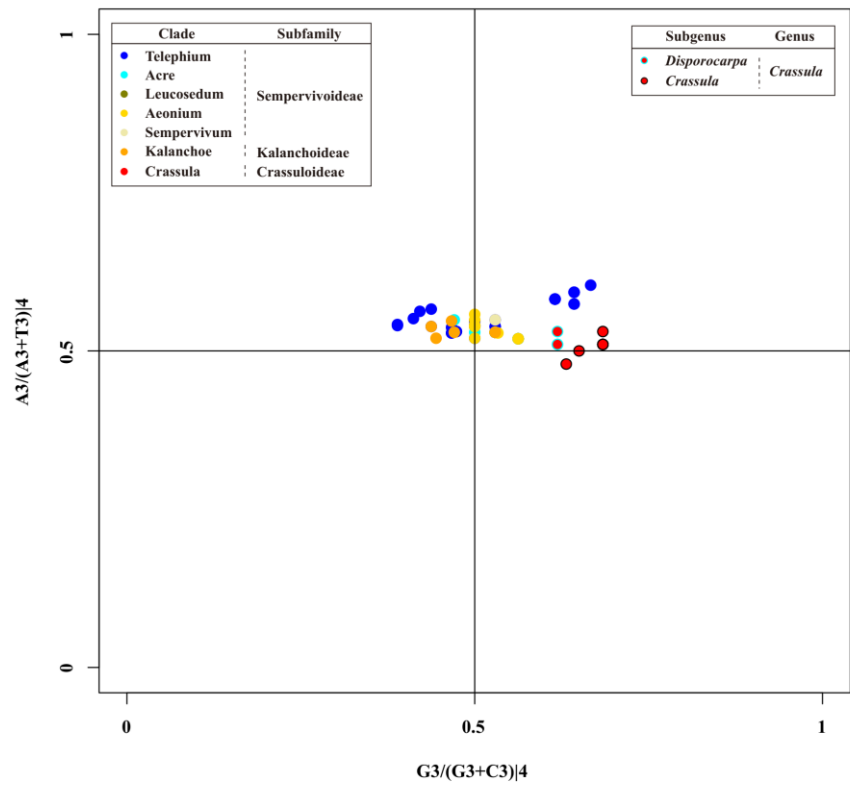

*psaA:*

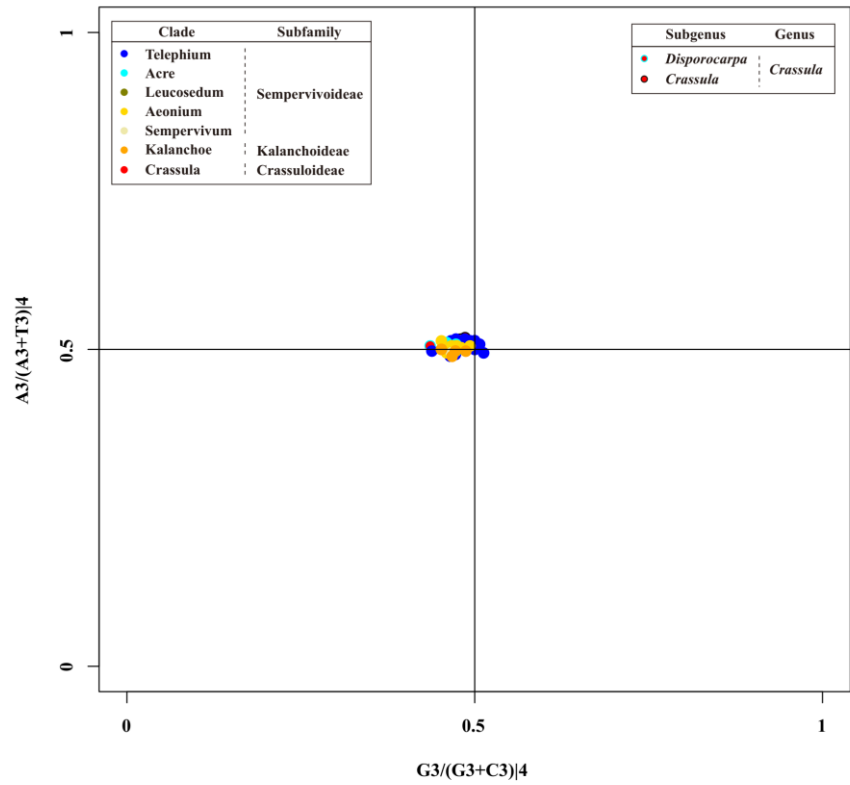

*psaB*:

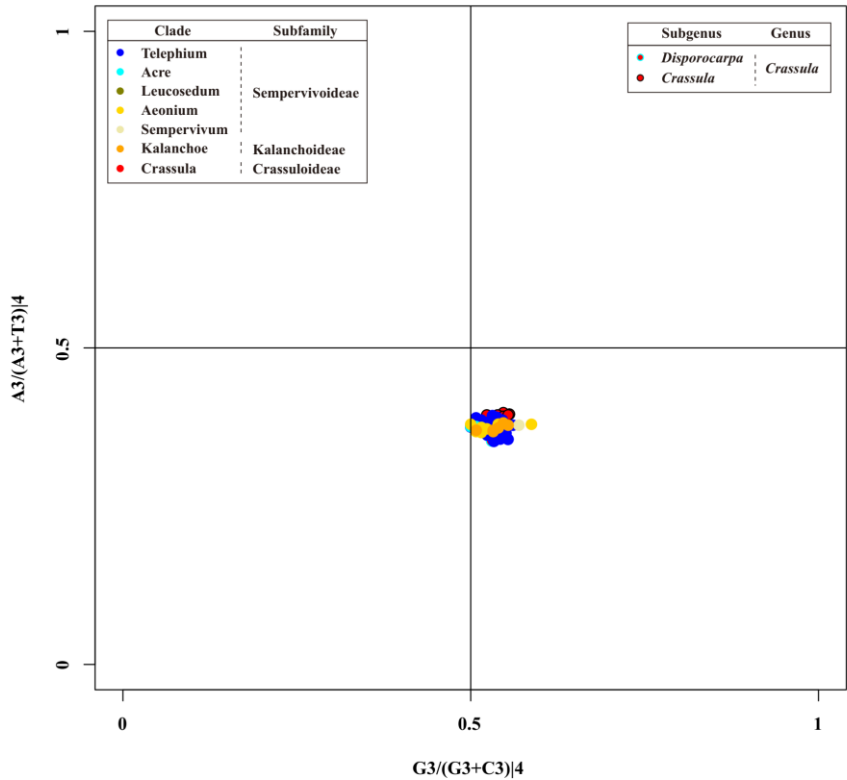

*psbA*:

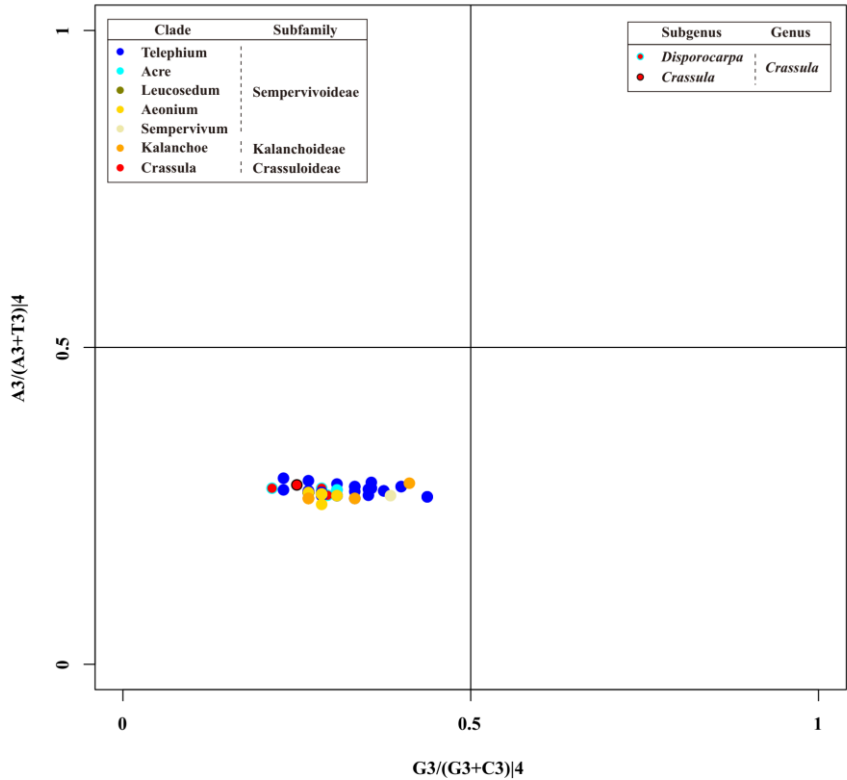

*psbB*:

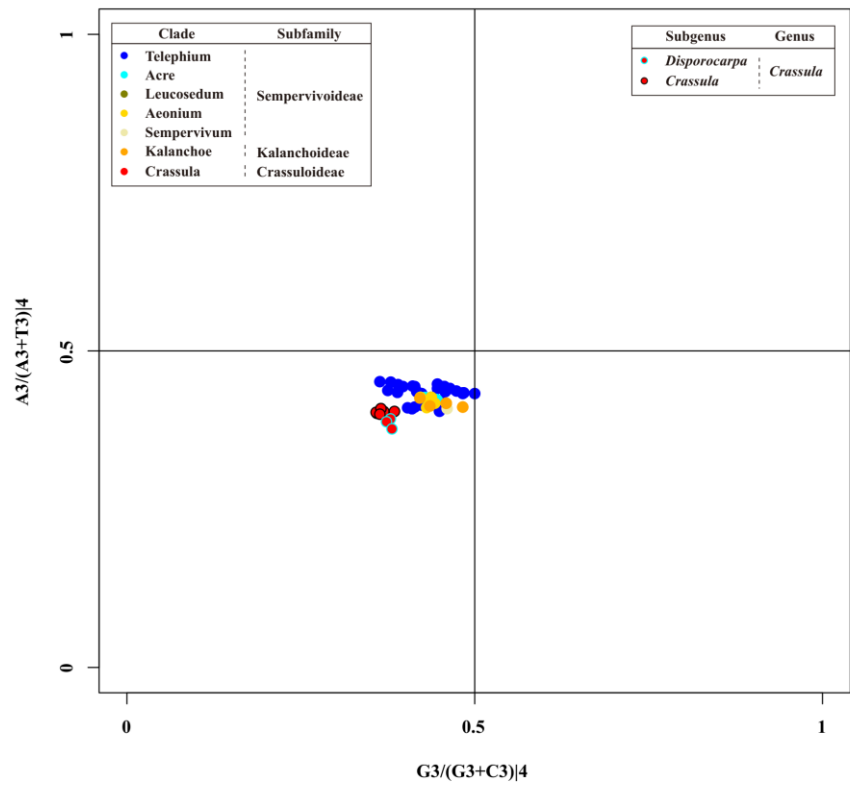

*psbC*:

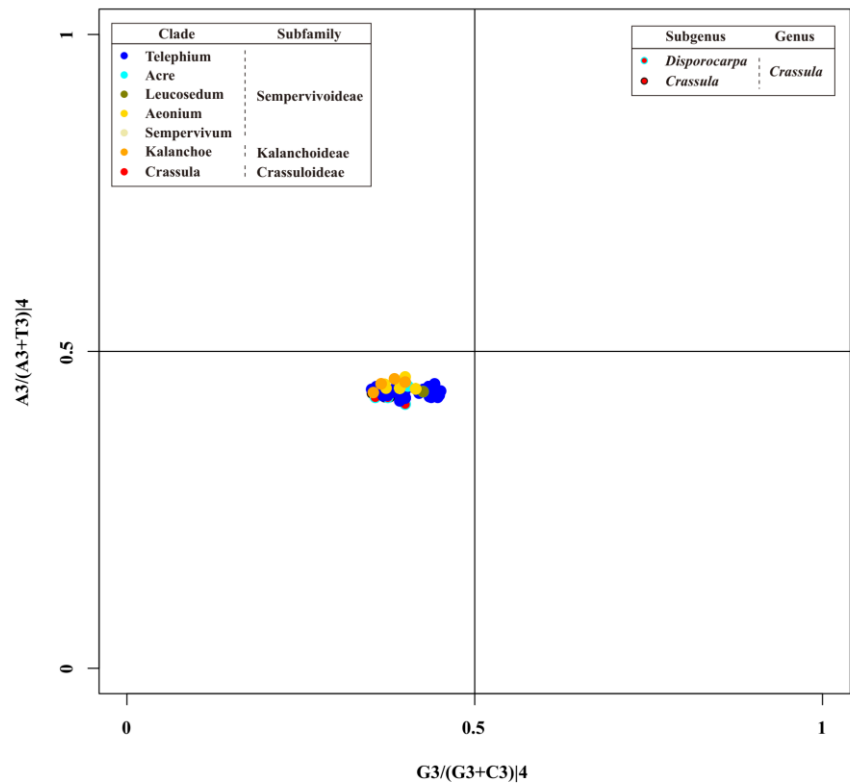

*psbD*:

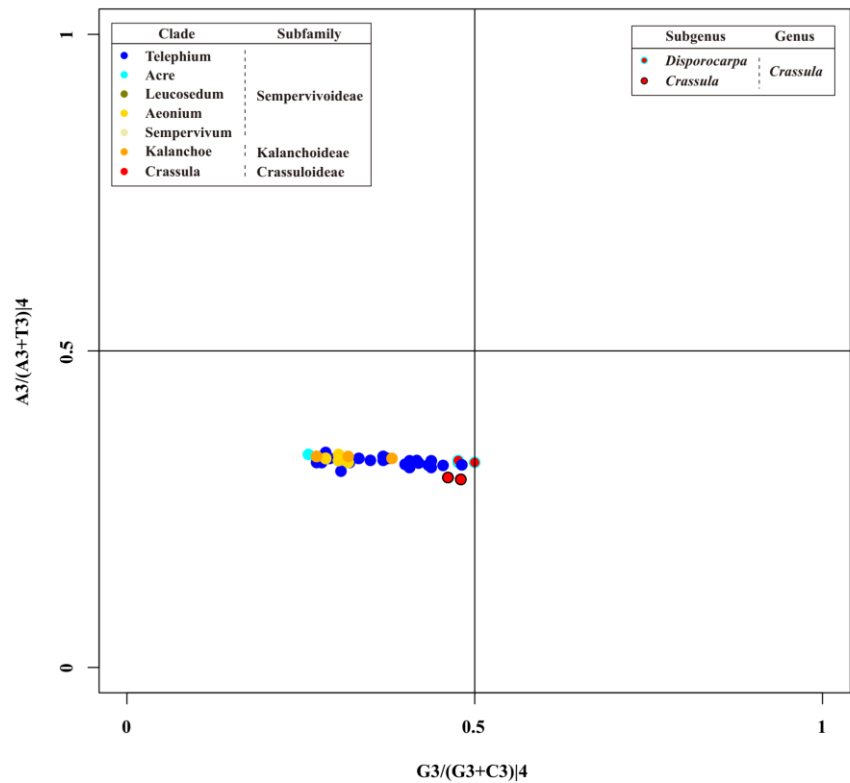

*rbcL*:

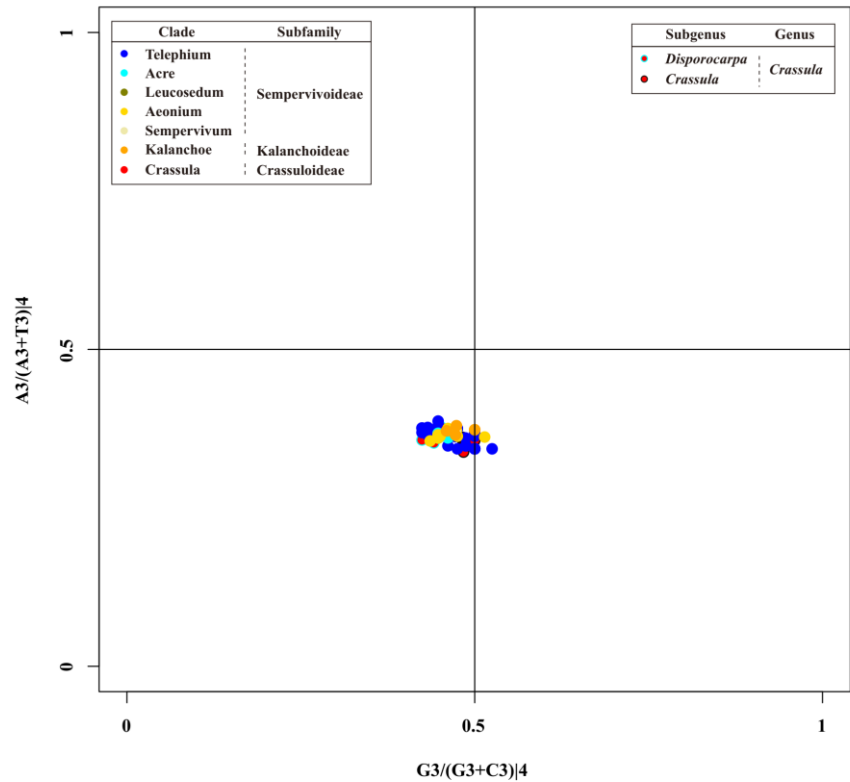



rpl2:

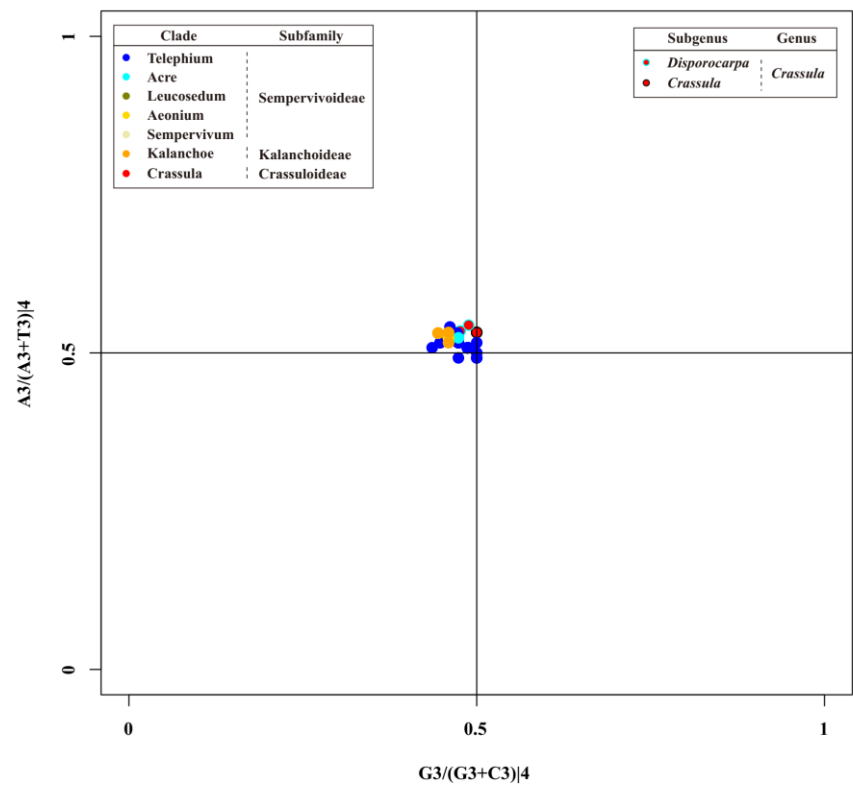

rpl14:

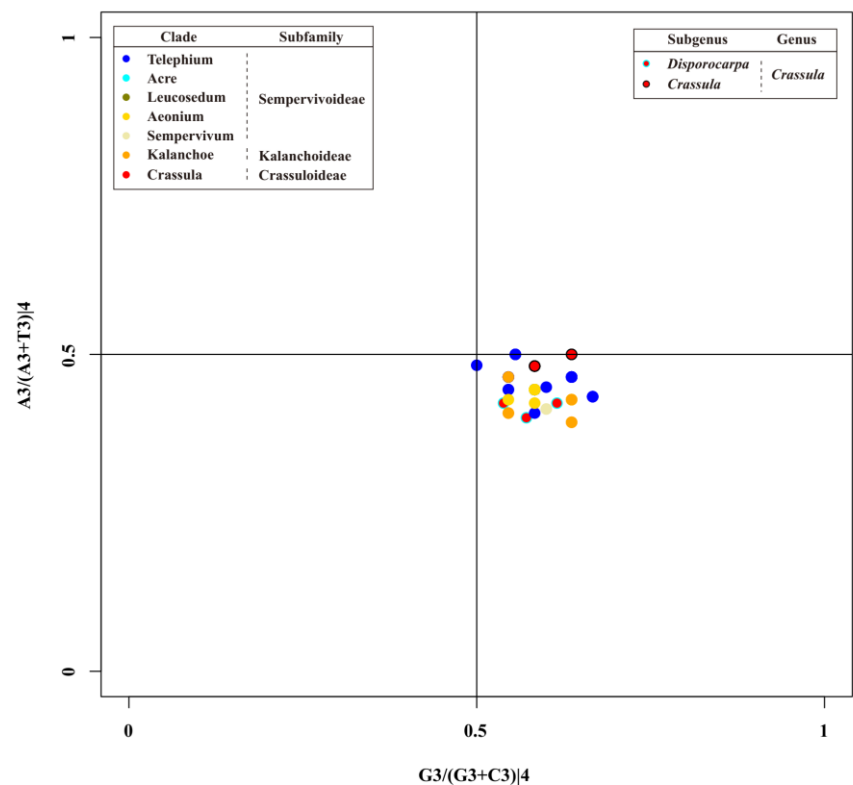

rpl16:

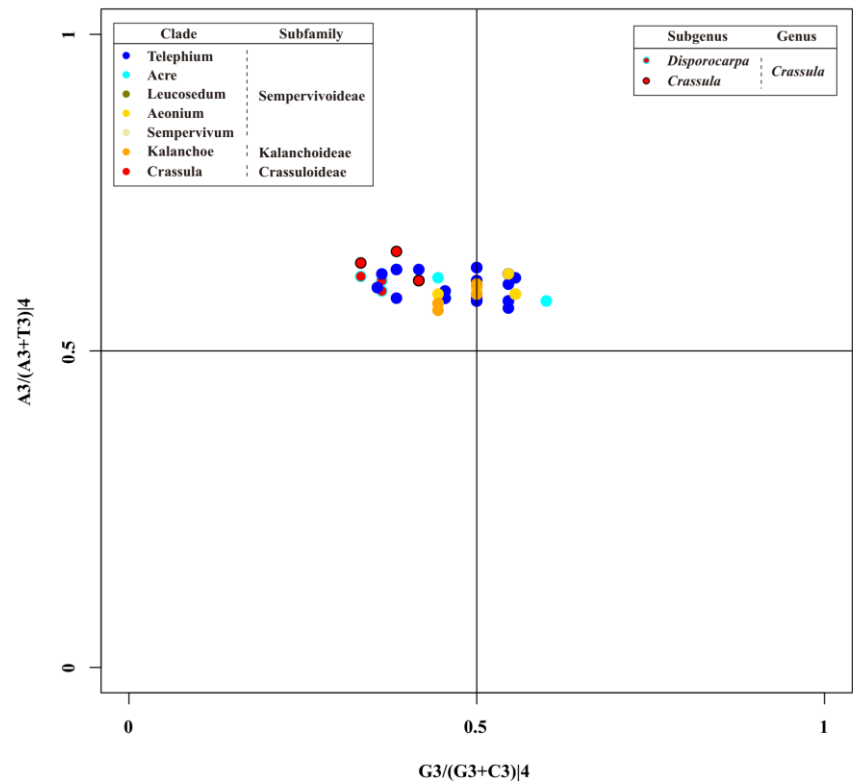

rpl20:

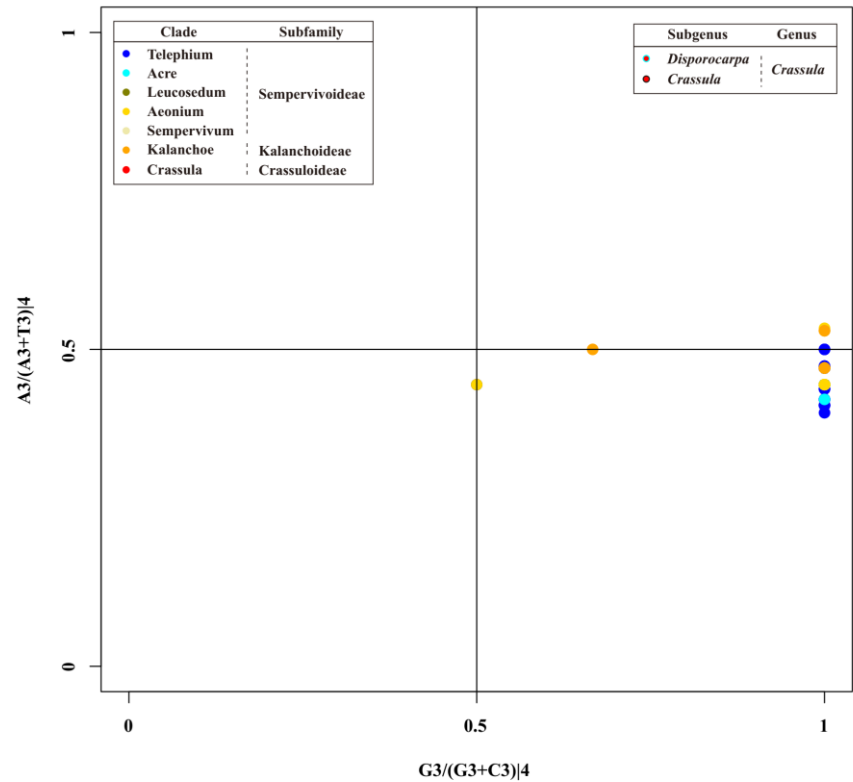

rpl22:

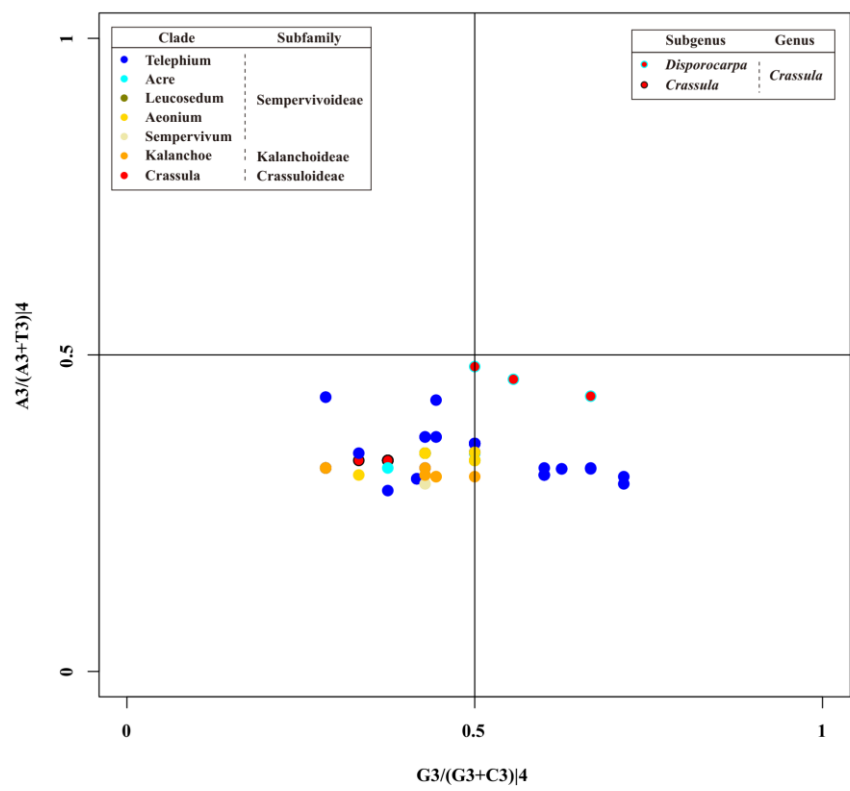

rpoA:

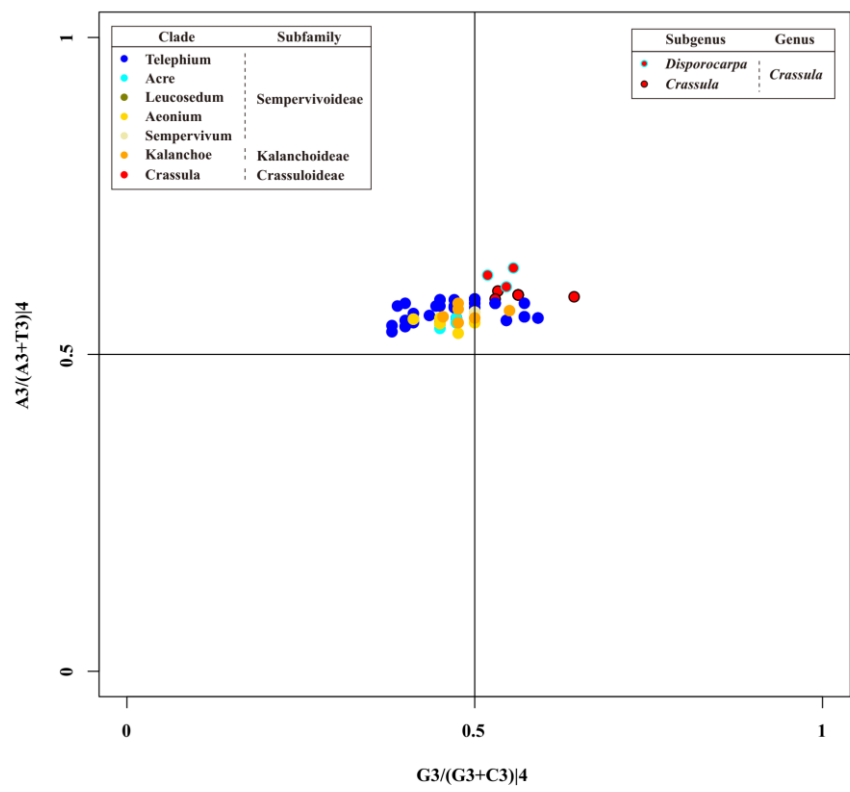

*rpoB*:

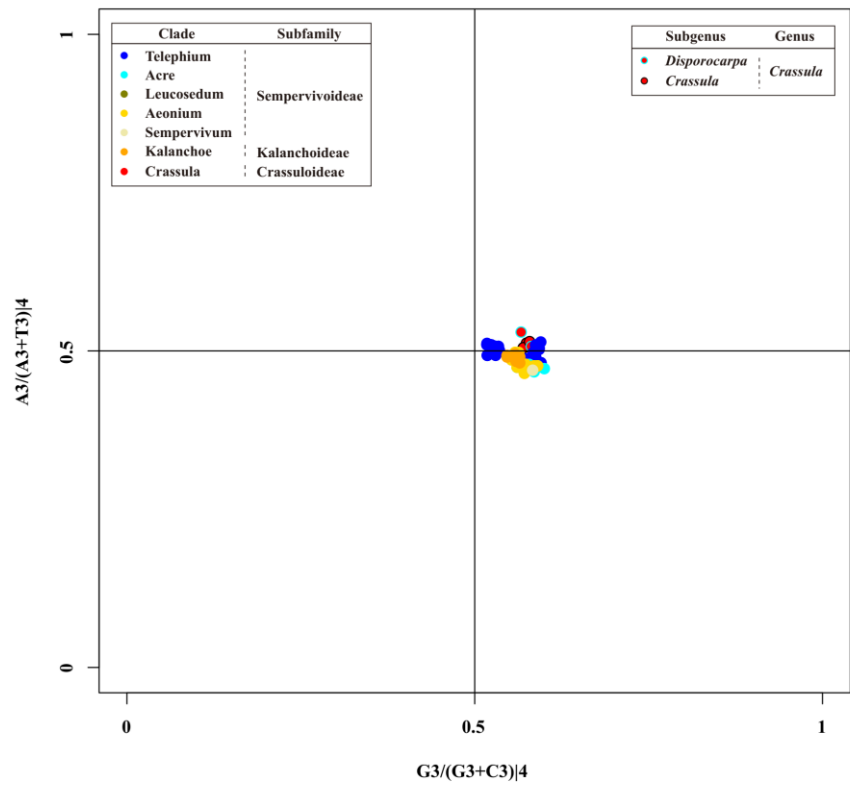

*rpoC1*:

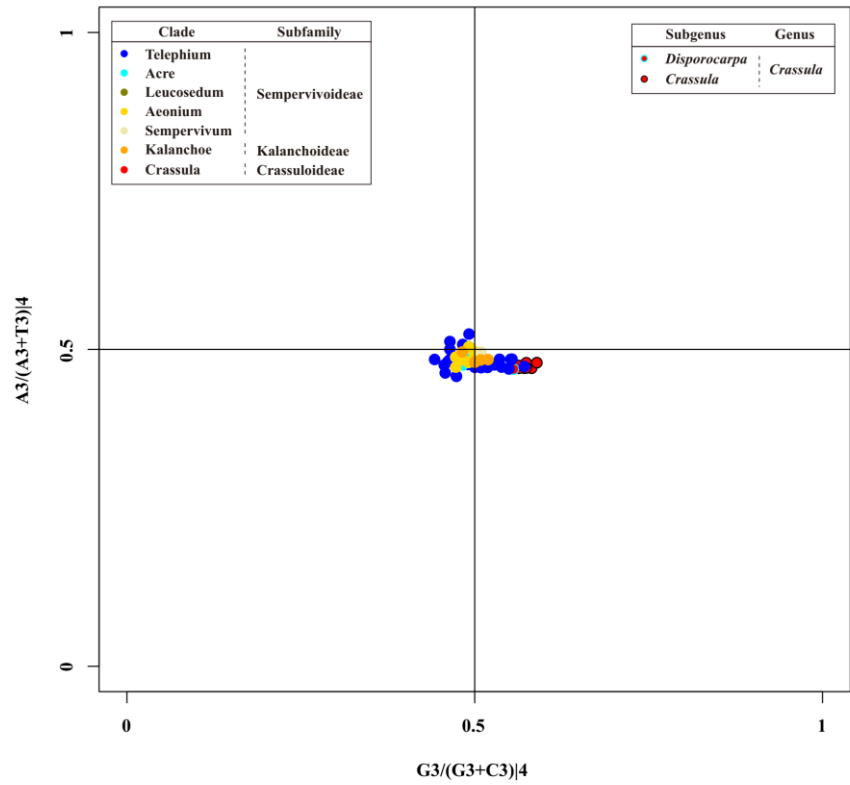

rpoC2:

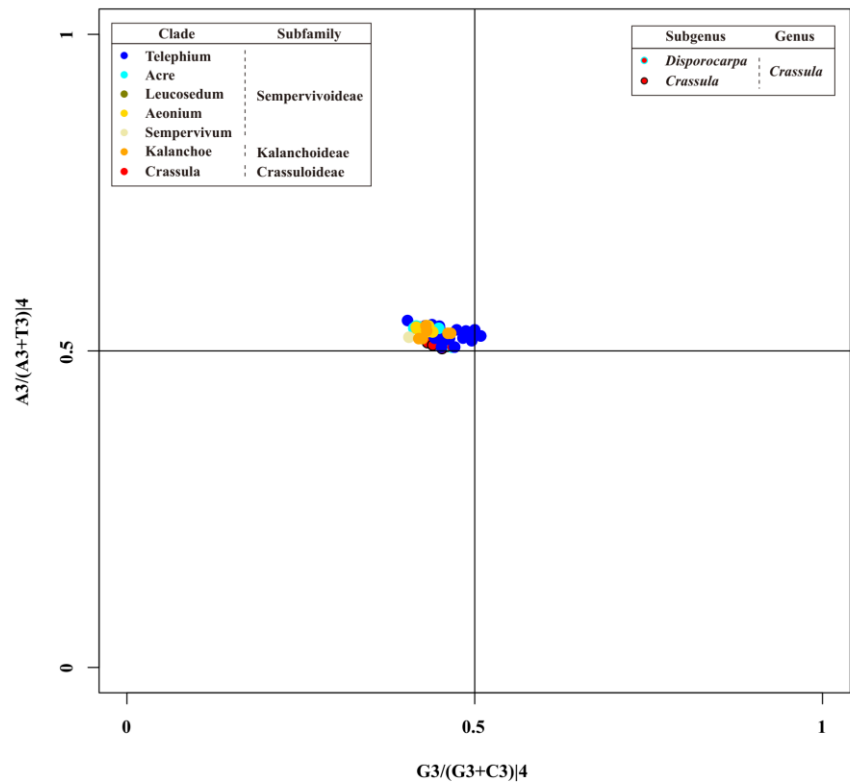

rps2:

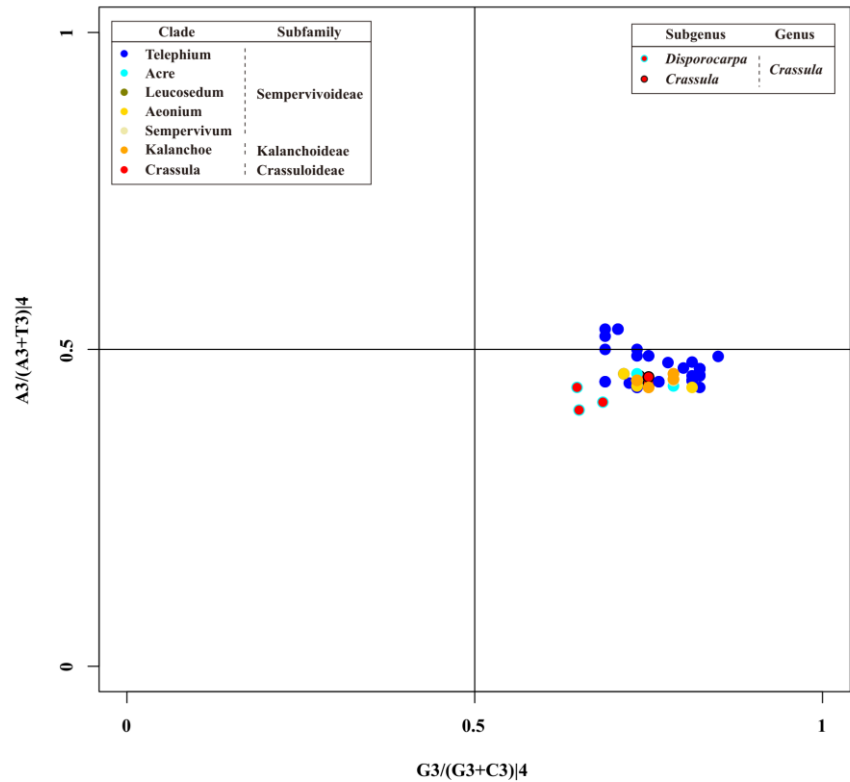

rps3:

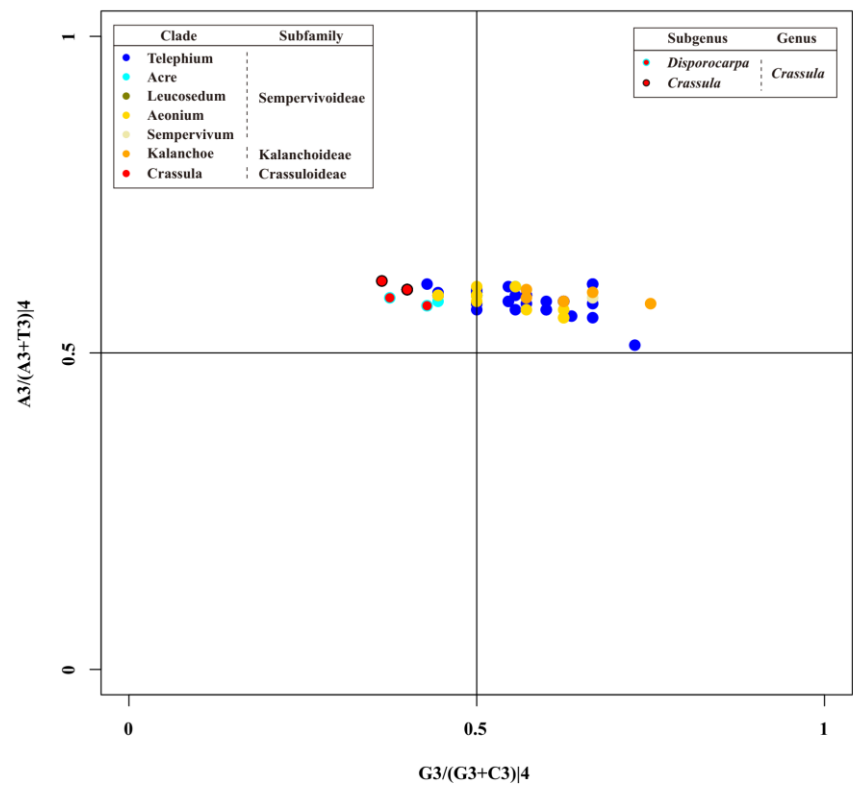

rps4:

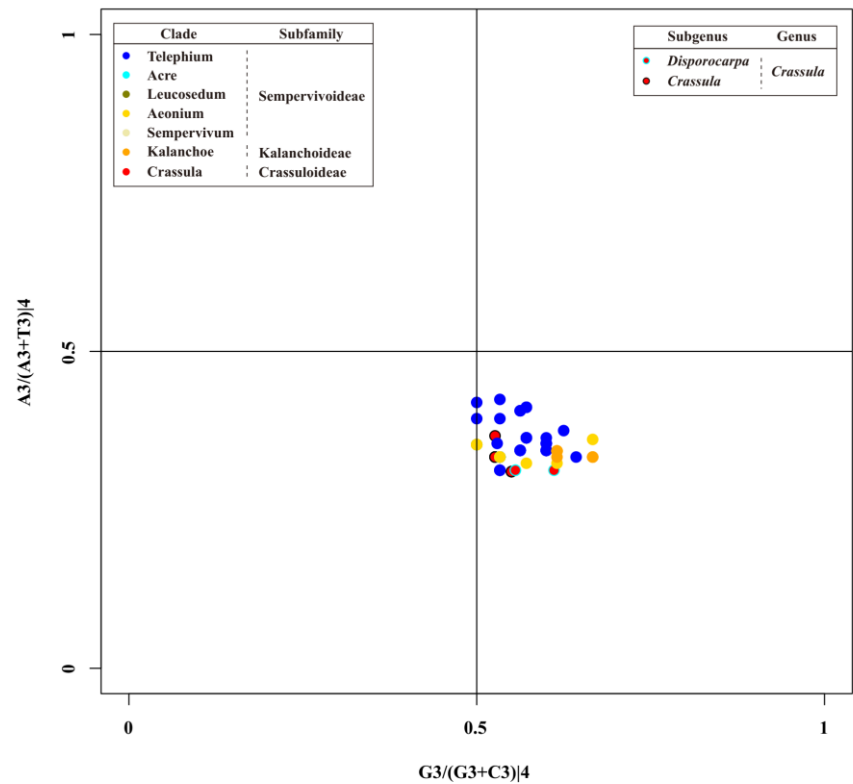

rps7:

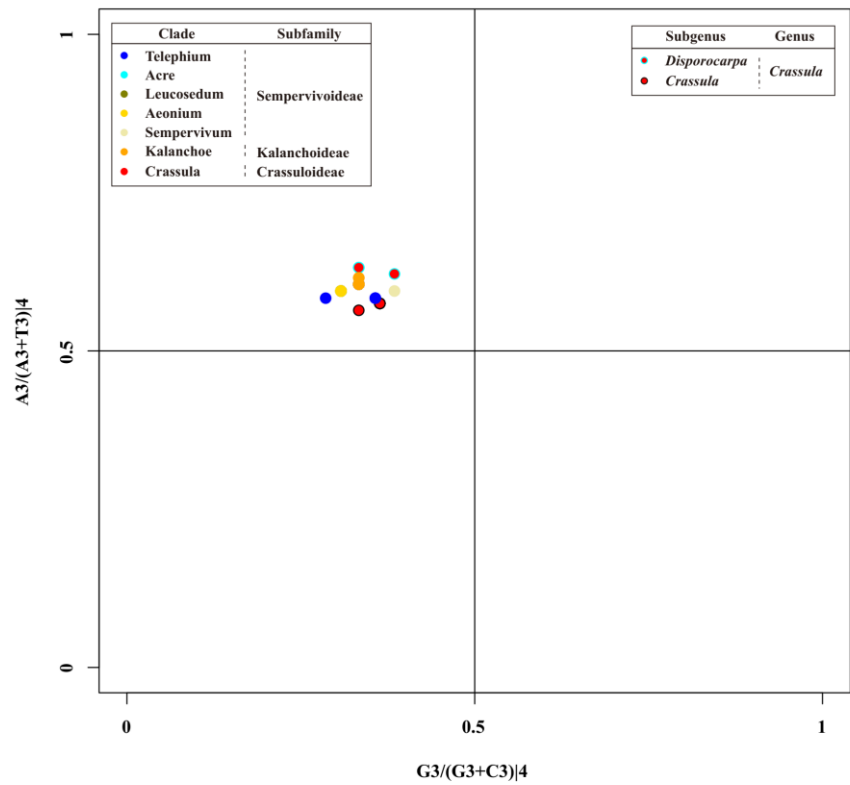

rps8:

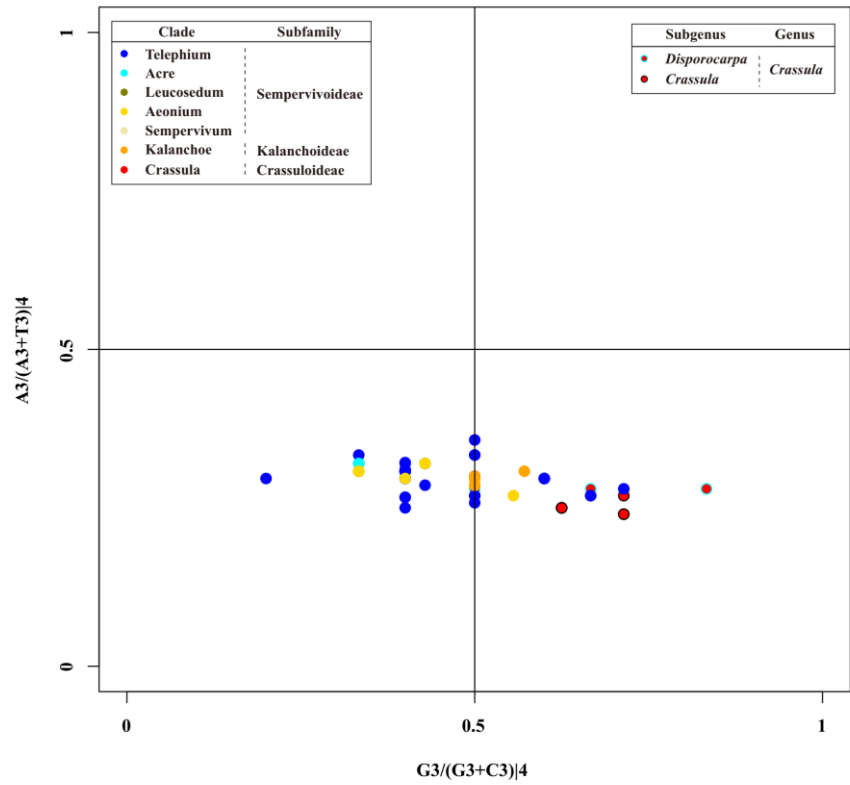

rps11:

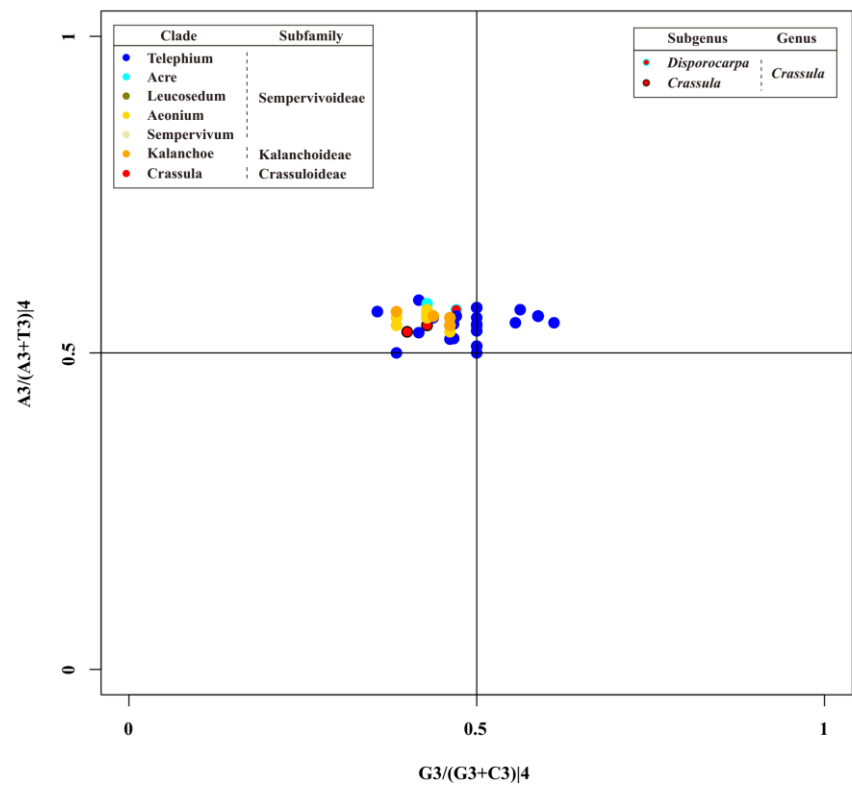

rps12:

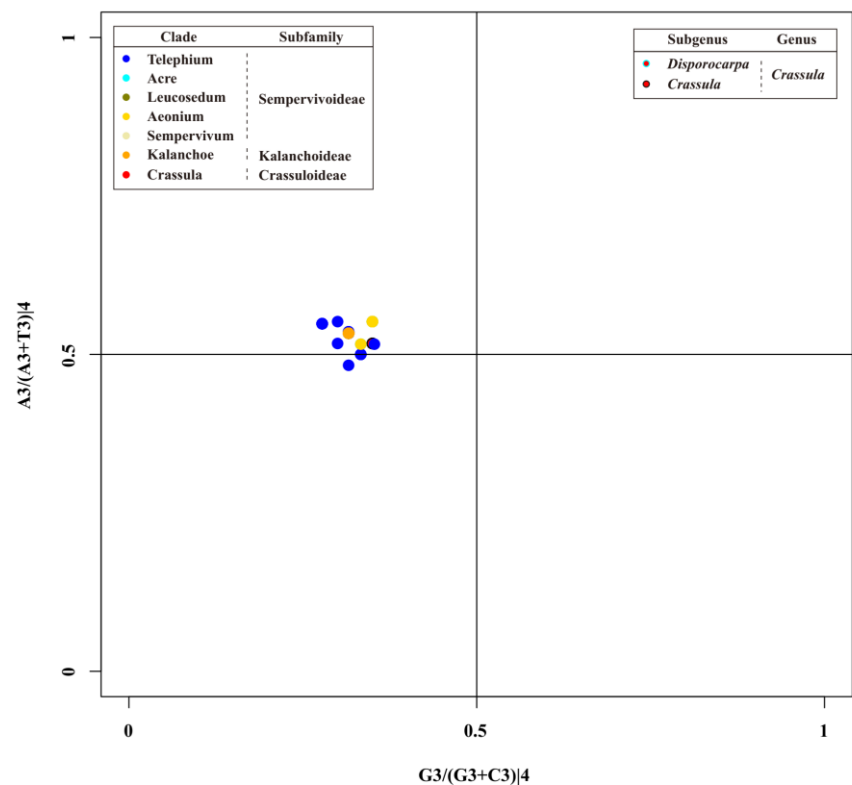



rps14:

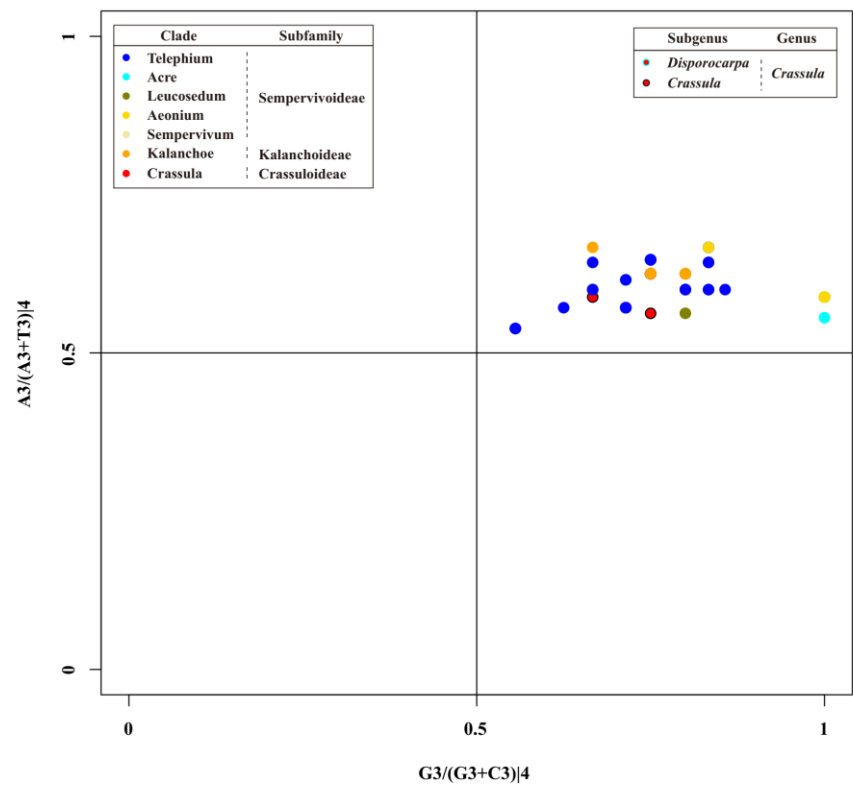

rps18:

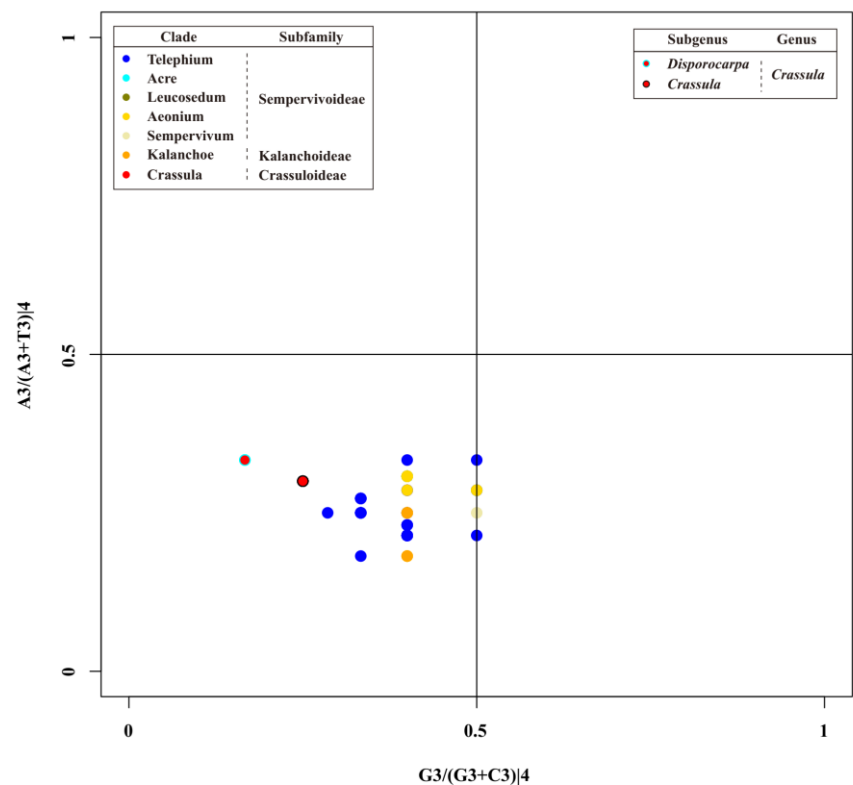

yef1:

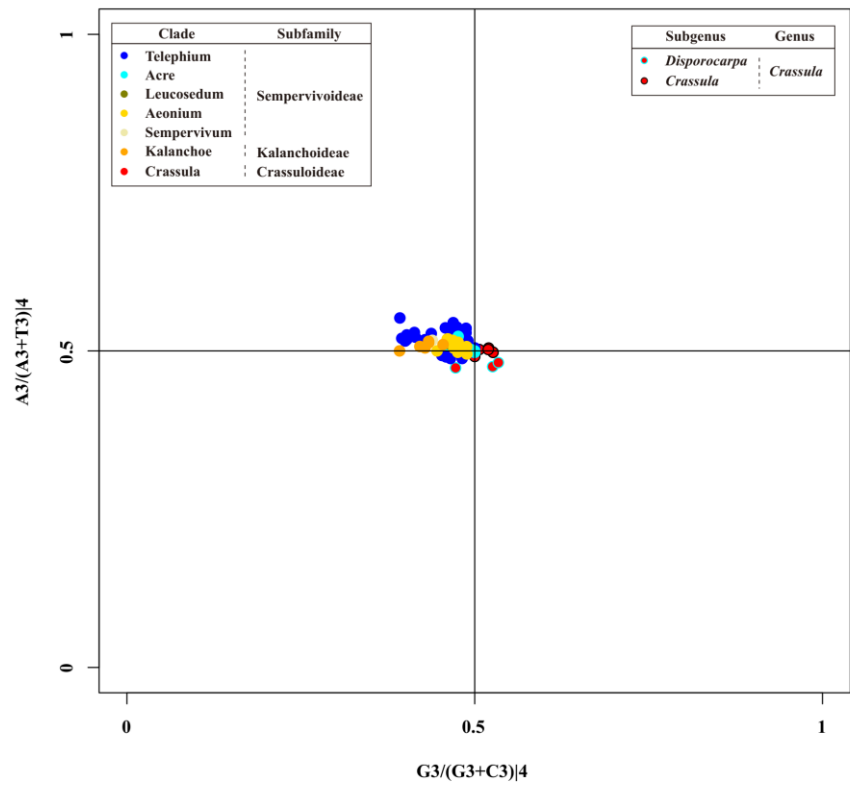

yef2:

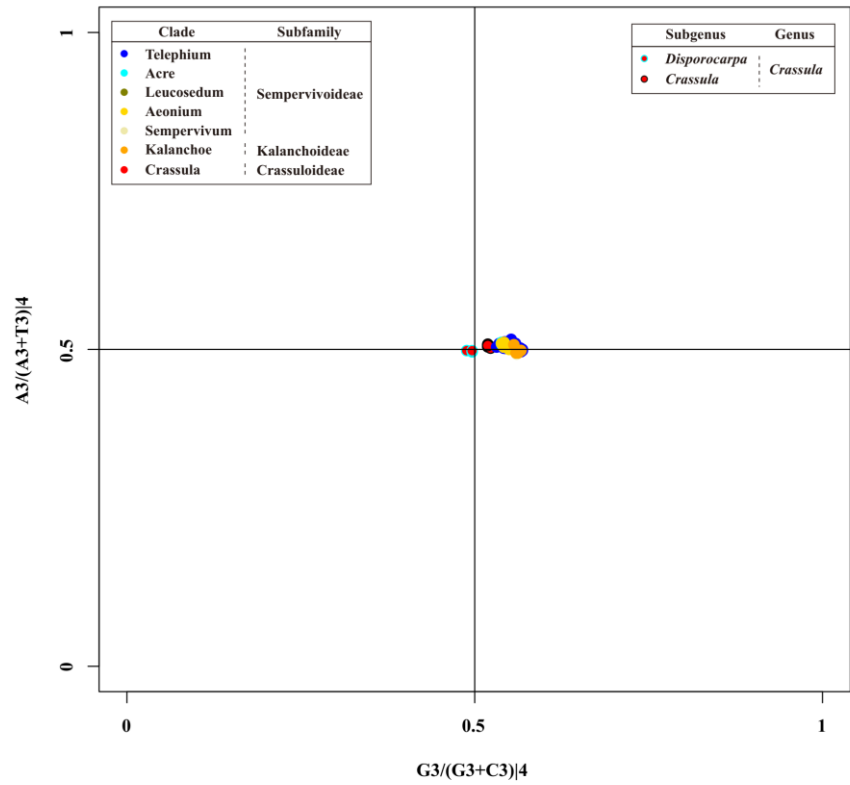

Supplement: s1 [file s1]
